# Supplementary material for: New Verticillene Diterpenoids, Eudesmane Sesquiterpenoids, and Hydroperoxysteroids from the Further Chemical Investigation of a Taiwanese Soft Coral Cespitularia sp
Source: MDPI journal article supplement (doi:10.3390/molecules28041521), 2023-02-04
Supplement: s1 [file s1]

## Supporting Information

### Further Verticillene Diterpenoids, Eudesmane Sesquiterpe-noids, and Hydroperoxysteroids from a Taiwanese Soft Coral *Cespitularia* sp.

Chung-Wei Fu<sup>1</sup>, You-Cheng Lin<sup>2</sup>, Shu-Fen Chiou<sup>1</sup>, Shu-Li Chen<sup>3</sup>, Chi-Chien Lin<sup>4</sup>, Hui-Chun Wang<sup>3</sup>, Chang-Feng Dai<sup>5</sup>, and Jyh-Horng Sheu<sup>1,2,3,6\*</sup>

<sup>1</sup>Department of Marine Biotechnology and Resources, National Sun Yat-sen University, Kaohsiung 804, Taiwan

<sup>2</sup>Doctoral Degree Program in Marine Biotechnology, National Sun Yat-sen University, Kaohsiung 804, Taiwan

<sup>3</sup>Graduate Institute of Natural Products, Kaohsiung Medical University, Kaohsiung 807, Taiwan

<sup>4</sup>Institute of Biomedical Sciences, National Chung-Hsing University, Taichung 402, Taiwan

<sup>5</sup>Institute of Oceanography, National Taiwan University, Taipei 106, Taiwan

<sup>6</sup>Department of Medical Research, China Medical University Hospital, China Medical University, Taichung 404, Taiwan

**\* Correspondence:**

Prof. Jyh-Horng Sheu

sheu@mail.nsysu.edu.tw

| No.                    | Content                                                                                      | page |
|------------------------|----------------------------------------------------------------------------------------------|------|
| <b>List of Figures</b> |                                                                                              |      |
| Figure S1.             | HRESIMS of compound <b>1</b> .....                                                           | 5    |
| Figure S2.             | <sup>1</sup> H NMR spectrum (600MHz) of compound <b>1</b> in CDCl <sub>3</sub> .....         | 5    |
| Figure S3.             | <sup>13</sup> C NMR spectrum (150 MHz) of compound <b>1</b> in CDCl <sub>3</sub> .....       | 6    |
| Figure S4.             | DEPT spectrum (150 MHz) of compound <b>1</b> in CDCl <sub>3</sub> .....                      | 6    |
| Figure S5.             | HSQC spectrum of compound <b>1</b> in CDCl <sub>3</sub> .....                                | 7    |
| Figure S6.             | <sup>1</sup> H- <sup>1</sup> H COSY spectrum of compound <b>1</b> in CDCl <sub>3</sub> ..... | 7    |
| Figure S7.             | HMBC spectrum of compound <b>1</b> in CDCl <sub>3</sub> .....                                | 8    |
| Figure S8.             | NOESY spectrum of compound <b>1</b> in CDCl <sub>3</sub> .....                               | 8    |
| Figure S9.             | HRESIMS of compound <b>1a</b> .....                                                          | 9    |
| Figure S10.            | <sup>1</sup> H NMR spectrum (600MHz) of compound <b>1a</b> in CDCl <sub>3</sub> .....        | 9    |
| Figure S11.            | <sup>13</sup> C NMR spectrum (150 MHz) of compound <b>1a</b> in CDCl <sub>3</sub> .          | 10   |
| Figure S12.            | HRESIMS of compound <b>2</b> .....                                                           | 10   |
| Figure S13.            | <sup>1</sup> H NMR spectrum (600MHz) of compound <b>2</b> in CDCl <sub>3</sub> .....         | 11   |
| Figure S14.            | <sup>13</sup> C NMR spectrum (150 MHz) of compound <b>2</b> in CDCl <sub>3</sub> ...         | 11   |
| Figure S15.            | DEPT spectrum (150 MHz) of compound <b>2</b> in CDCl <sub>3</sub> .....                      | 12   |
| Figure S16.            | HSQC spectrum of compound <b>2</b> in CDCl <sub>3</sub> .....                                | 12   |
| Figure S17.            | <sup>1</sup> H- <sup>1</sup> H COSY spectrum of compound <b>2</b> in CDCl <sub>3</sub> ..... | 13   |
| Figure S18.            | HMBC spectrum of compound <b>2</b> in CDCl <sub>3</sub> .....                                | 13   |
| Figure S19.            | The amplificatory HMBC spectrum of compound <b>2</b> in CDCl <sub>3</sub><br>.....           | 14   |
| Figure S20.            | NOESY spectrum of compound <b>2</b> in CDCl <sub>3</sub> .....                               | 14   |
| Figure S21.            | HRESIMS of compound <b>3</b> .....                                                           | 15   |
| Figure S22.            | <sup>1</sup> H NMR spectrum (600MHz) of compound <b>3</b> in CDCl <sub>3</sub> .....         | 15   |
| Figure S23.            | <sup>13</sup> C NMR spectrum (150 MHz) of compound <b>3</b> in CDCl <sub>3</sub> ...         | 16   |
| Figure S24.            | DEPT spectrum (150 MHz) of compound <b>3</b> in CDCl <sub>3</sub> .....                      | 16   |
| Figure S25.            | HSQC spectrum of compound <b>3</b> in CDCl <sub>3</sub> .....                                | 17   |
| Figure S26.            | <sup>1</sup> H- <sup>1</sup> H COSY spectrum of compound <b>3</b> in CDCl <sub>3</sub> ..... | 17   |
| Figure S27.            | HMBC spectrum of compound <b>3</b> in CDCl <sub>3</sub> .....                                | 18   |
| Figure S28.            | NOESY spectrum of compound <b>3</b> in CDCl <sub>3</sub> .....                               | 18   |
| Figure S29.            | HRESIMS of compound <b>4</b> .....                                                           | 19   |
| Figure S30.            | <sup>1</sup> H NMR spectrum (600MHz) of compound <b>4</b> in CDCl <sub>3</sub> .....         | 19   |
| Figure S31.            | <sup>13</sup> C NMR spectrum (150 MHz) of compound <b>4</b> in CDCl <sub>3</sub> ...         | 20   |
| Figure S32.            | DEPT spectrum (150 MHz) of compound <b>4</b> in CDCl <sub>3</sub> .....                      | 20   |

|                                                                                                                 |    |
|-----------------------------------------------------------------------------------------------------------------|----|
| <b>Figure S33.</b> HSQC spectrum of compound <b>4</b> in CDCl <sub>3</sub> .....                                | 21 |
| <b>Figure S34.</b> <sup>1</sup> H- <sup>1</sup> H COSY spectrum of compound <b>4</b> in CDCl <sub>3</sub> ..... | 21 |
| <b>Figure S35.</b> HMBC spectrum of compound <b>4</b> in CDCl <sub>3</sub> .....                                | 22 |
| <b>Figure S36.</b> NOESY spectrum of compound <b>4</b> in CDCl <sub>3</sub> .....                               | 22 |
| <b>Figure S37.</b> HRESIMS of compound <b>5</b> .....                                                           | 23 |
| <b>Figure S38.</b> <sup>1</sup> H NMR spectrum (600MHz) of compound <b>5</b> in CDCl <sub>3</sub> .....         | 23 |
| <b>Figure S39.</b> <sup>13</sup> C NMR spectrum (150 MHz) of compound <b>5</b> in CDCl <sub>3</sub> ...         | 24 |
| <b>Figure S40.</b> DEPT spectrum (150 MHz) of compound <b>5</b> in CDCl <sub>3</sub> .....                      | 24 |
| <b>Figure S41.</b> HSQC spectrum of compound <b>5</b> in CDCl <sub>3</sub> .....                                | 25 |
| <b>Figure S42.</b> <sup>1</sup> H- <sup>1</sup> H COSY spectrum of compound <b>5</b> in CDCl <sub>3</sub> ..... | 25 |
| <b>Figure S43.</b> HMBC spectrum of compound <b>5</b> in CDCl <sub>3</sub> .....                                | 26 |
| <b>Figure S44.</b> NOESY spectrum of compound <b>5</b> in CDCl <sub>3</sub> .....                               | 26 |
| <b>Figure S45.</b> <sup>1</sup> H NMR spectrum (400MHz) of compound <b>6</b> in CDCl <sub>3</sub> .....         | 27 |
| <b>Figure S46.</b> <sup>13</sup> C NMR spectrum (100 MHz) of compound <b>6</b> in CDCl <sub>3</sub> ...         | 27 |
| <b>Figure S47.</b> <sup>1</sup> H NMR spectrum (400MHz) of compound <b>7</b> in CDCl <sub>3</sub> .....         | 28 |
| <b>Figure S48.</b> <sup>13</sup> C NMR spectrum (100 MHz) of compound <b>7</b> in CDCl <sub>3</sub> ...         | 28 |
| <b>Figure S49.</b> <sup>1</sup> H NMR spectrum (400MHz) of compound <b>8</b> in CDCl <sub>3</sub> .....         | 29 |
| <b>Figure S50.</b> <sup>13</sup> C NMR spectrum (100 MHz) of compound <b>8</b> in CDCl <sub>3</sub> ...         | 29 |
| <b>Figure S51.</b> <sup>1</sup> H NMR spectrum (400MHz) of compound <b>9</b> in CDCl <sub>3</sub> .....         | 30 |
| <b>Figure S52.</b> <sup>13</sup> C NMR spectrum (100 MHz) of compound <b>9</b> in CDCl <sub>3</sub> ...         | 30 |
| <b>Figure S53.</b> <sup>1</sup> H NMR spectrum (400MHz) of compound <b>10</b> in CDCl <sub>3</sub> ...          | 31 |
| <b>Figure S54.</b> <sup>13</sup> C NMR spectrum (100 MHz) of compound <b>10</b> in CDCl <sub>3</sub> .          | 31 |
| <b>Figure S55.</b> <sup>1</sup> H NMR spectrum (600MHz) of compound <b>11</b> in CDCl <sub>3</sub> ...          | 32 |
| <b>Figure S56.</b> <sup>13</sup> C NMR spectrum (150 MHz) of compound <b>11</b> in CDCl <sub>3</sub> .          | 32 |
| <b>Figure S57.</b> <sup>1</sup> H NMR spectrum (400MHz) of compound <b>12</b> in CDCl <sub>3</sub> ...          | 33 |
| <b>Figure S58.</b> <sup>13</sup> C NMR spectrum (100 MHz) of compound <b>12</b> in CDCl <sub>3</sub> .          | 33 |
| <b>Figure S59.</b> <sup>1</sup> H NMR spectrum (400MHz) of compound <b>13</b> in CDCl <sub>3</sub> ...          | 34 |
| <b>Figure S60.</b> <sup>13</sup> C NMR spectrum (100 MHz) of compound <b>13</b> in CDCl <sub>3</sub> .          | 34 |
| <b>Figure S61.</b> <sup>1</sup> H NMR spectrum (400MHz) of compound <b>14</b> in CDCl <sub>3</sub> ...          | 35 |
| <b>Figure S62.</b> <sup>13</sup> C NMR spectrum (100 MHz) of compound <b>14</b> in CDCl <sub>3</sub> .          | 35 |
| <b>Figure S63.</b> <sup>1</sup> H NMR spectrum (400MHz) of compound <b>15</b> in CDCl <sub>3</sub> ...          | 36 |
| <b>Figure S64.</b> <sup>13</sup> C NMR spectrum (100 MHz) of compound <b>15</b> in CDCl <sub>3</sub> .          | 36 |
| <b>Figure S65.</b> <sup>1</sup> H NMR spectrum (400MHz) of compound <b>16</b> in CDCl <sub>3</sub> ...          | 37 |
| <b>Figure S66.</b> <sup>13</sup> C NMR spectrum (100 MHz) of compound <b>16</b> in CDCl <sub>3</sub> .          | 37 |
| <b>Figure S67.</b> <sup>1</sup> H NMR spectrum (400MHz) of compound <b>17</b> in CDCl <sub>3</sub> ...          | 38 |
| <b>Figure S68.</b> <sup>13</sup> C NMR spectrum (100 MHz) of compound <b>17</b> in CDCl <sub>3</sub> .          | 38 |

### List of Tables

|                                                                                                                                                                                                                    |    |
|--------------------------------------------------------------------------------------------------------------------------------------------------------------------------------------------------------------------|----|
| <b>Table S1.</b> The cytotoxicity data of compounds <b>1–16</b> and <b>1a</b> . .....                                                                                                                              | 39 |
| <b>Table S2.</b> Antibacterial activity (zone of inhibition in mm).....                                                                                                                                            | 40 |
| <b>Table S3.</b> Inhibitory effects of compounds <b>1–10</b> , <b>1a</b> , <b>14</b> , and <b>15</b> on TNF- $\alpha$<br>expression, PGE <sub>2</sub> , and NO production in LPS induced dendritic cells.<br>..... | 41 |

# Analysis Info

Analysis Name D:\Data\1\S9CL21513A\_000005.d  
 Method broadband first signal  
 Sample Name S9-CL2-1-5-13A  
 Comment ESI Positive

4/1/2021 3:18:11 PM  
 Operator: YU HSIAO-CHING  
 Instrument: BRUKER FT-MS solariX

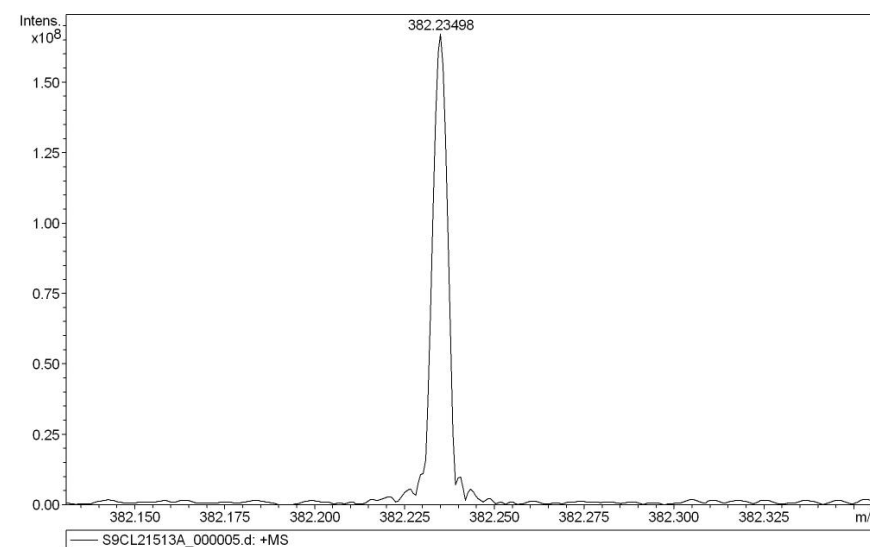

| Meas. m/z | # | Formula                                           | Score  | m/z       | err [mDa] | err [ppm] | mSigma | rdb | e <sup>-</sup> Conf | N-Rule |
|-----------|---|---------------------------------------------------|--------|-----------|-----------|-----------|--------|-----|---------------------|--------|
| 382.23498 | 1 | C <sub>22</sub> H <sub>33</sub> NNaO <sub>3</sub> | 100.00 | 382.23527 | 0.29      | 0.75      | 16.4   | 6.5 | even                | ok     |

**Figure S1.** HRESIMS of compound **1**

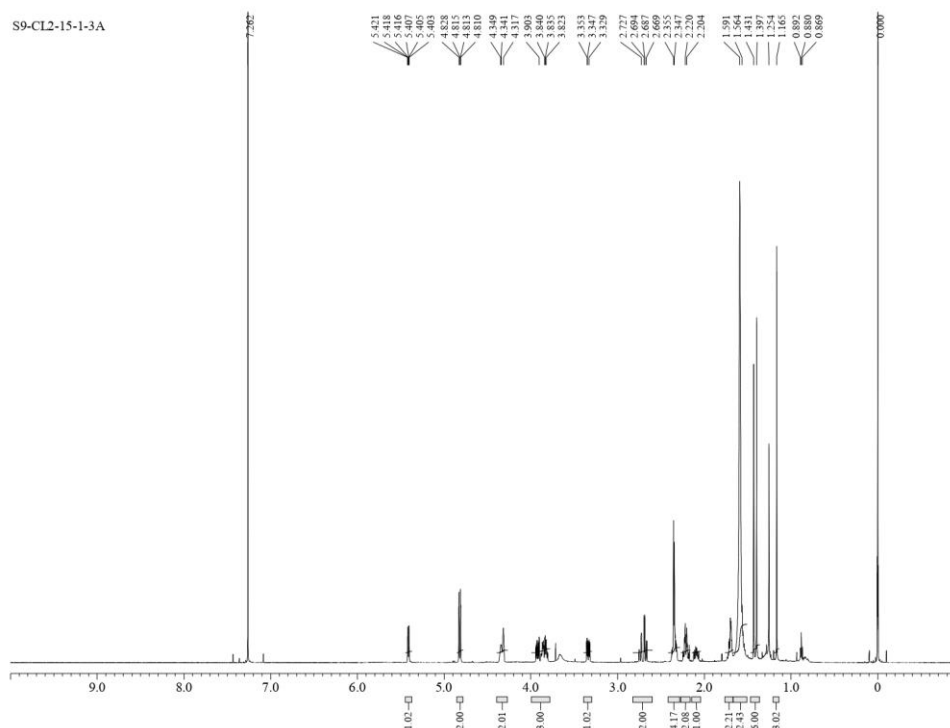

**Figure S2.** <sup>1</sup>H NMR spectrum (600MHz) of compound **1** in CDCl<sub>3</sub>

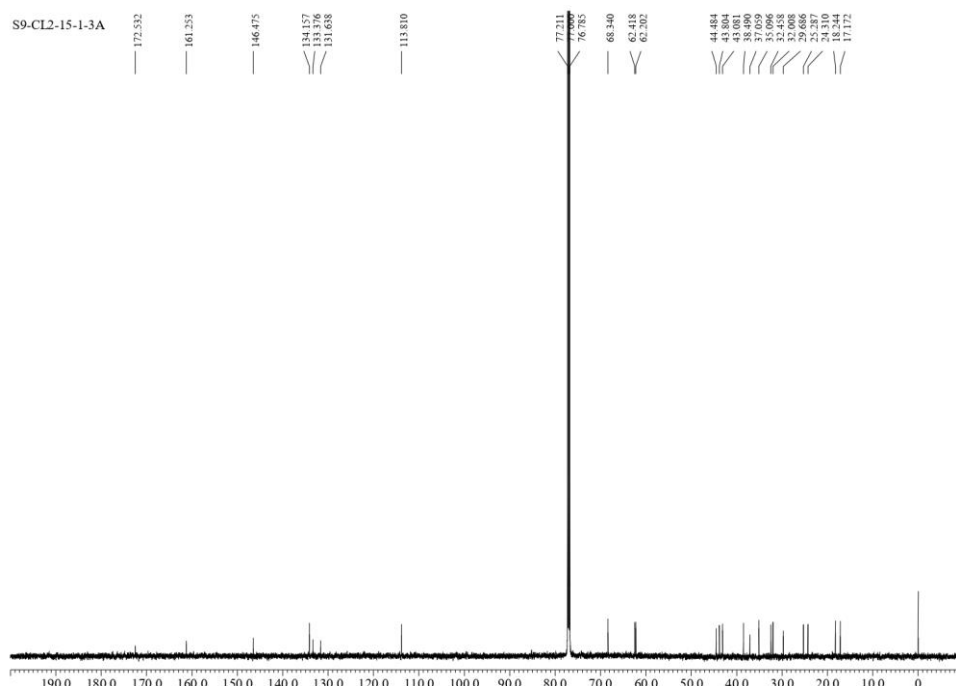

**Figure S3.**  $^{13}\text{C}$  NMR spectrum (150 MHz) of compound **1** in  $\text{CDCl}_3$

Y = 135[deg]  
S9-CL2-15-1-3A

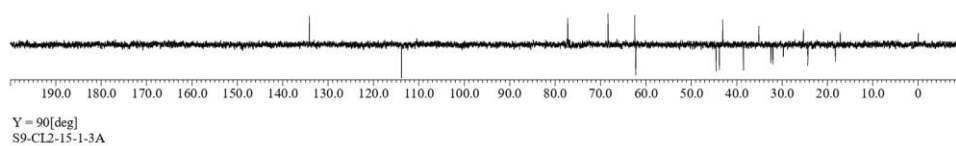

**Figure S4.** DEPT spectrum (150 MHz) of compound **1** in  $\text{CDCl}_3$

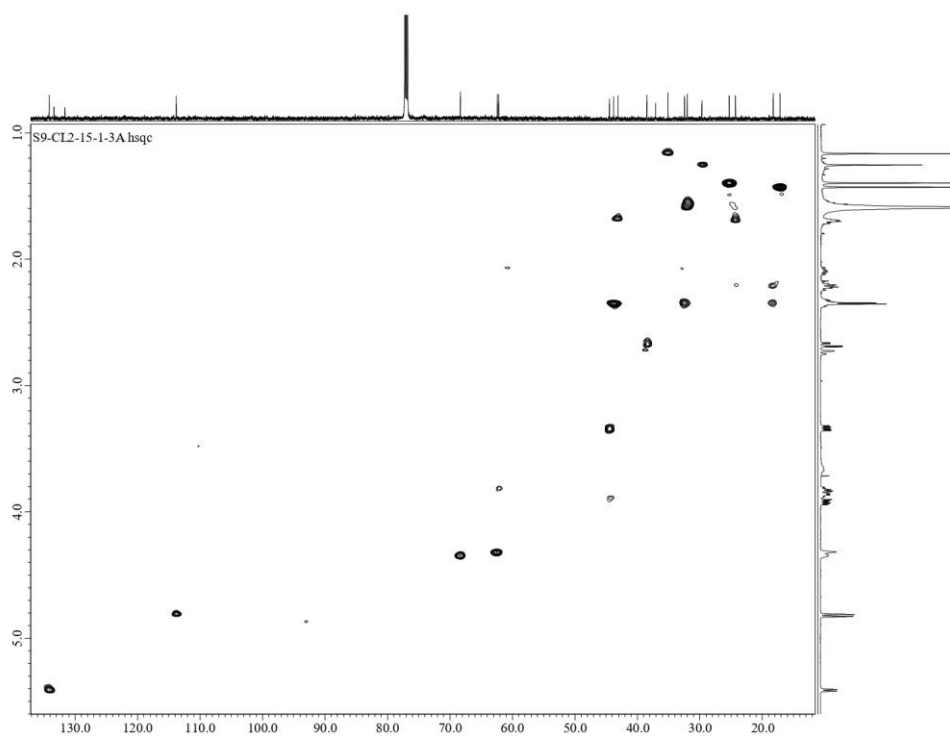

**Figure S5.** HSQC spectrum of compound **1** in CDCl<sub>3</sub>

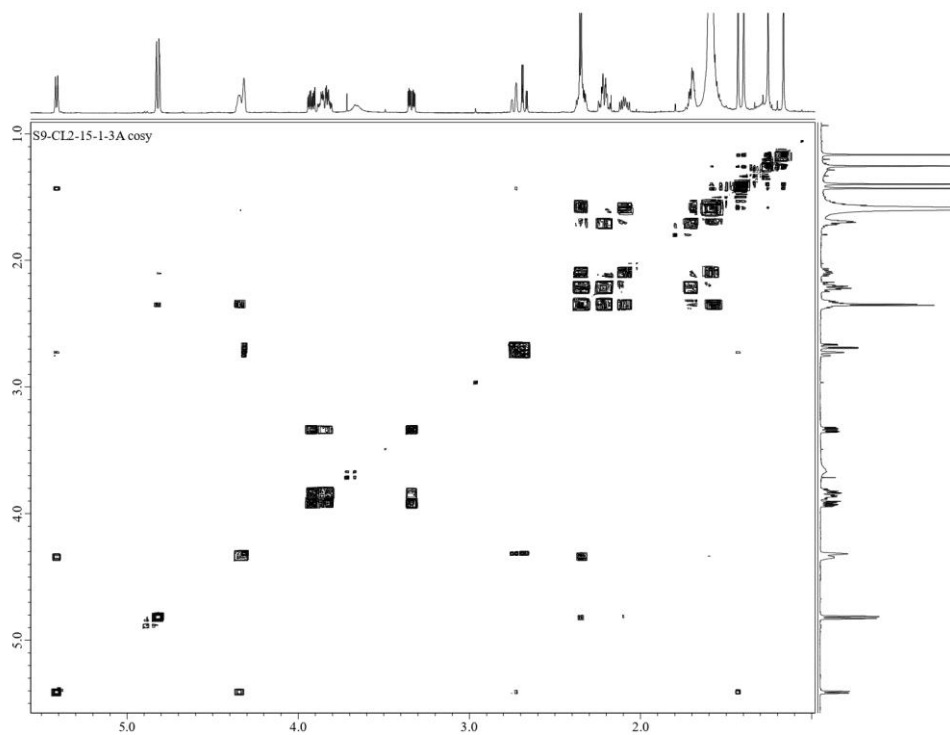

**Figure S6.** <sup>1</sup>H-<sup>1</sup>H COSY spectrum of compound **1** in CDCl<sub>3</sub>

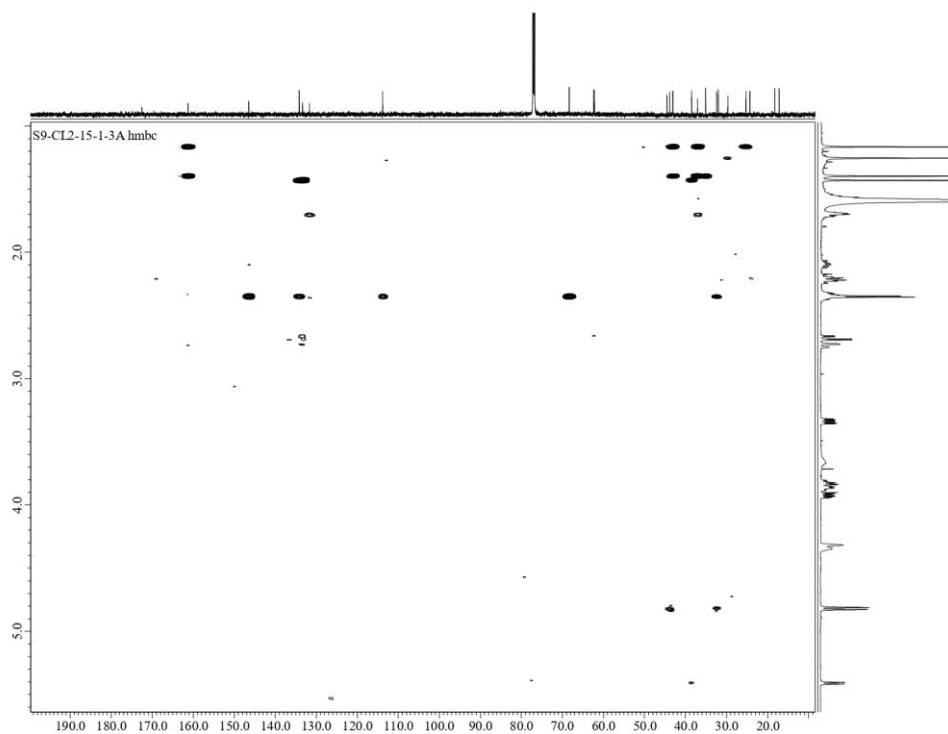

**Figure S7.** HMBC spectrum of compound **1** in  $\text{CDCl}_3$

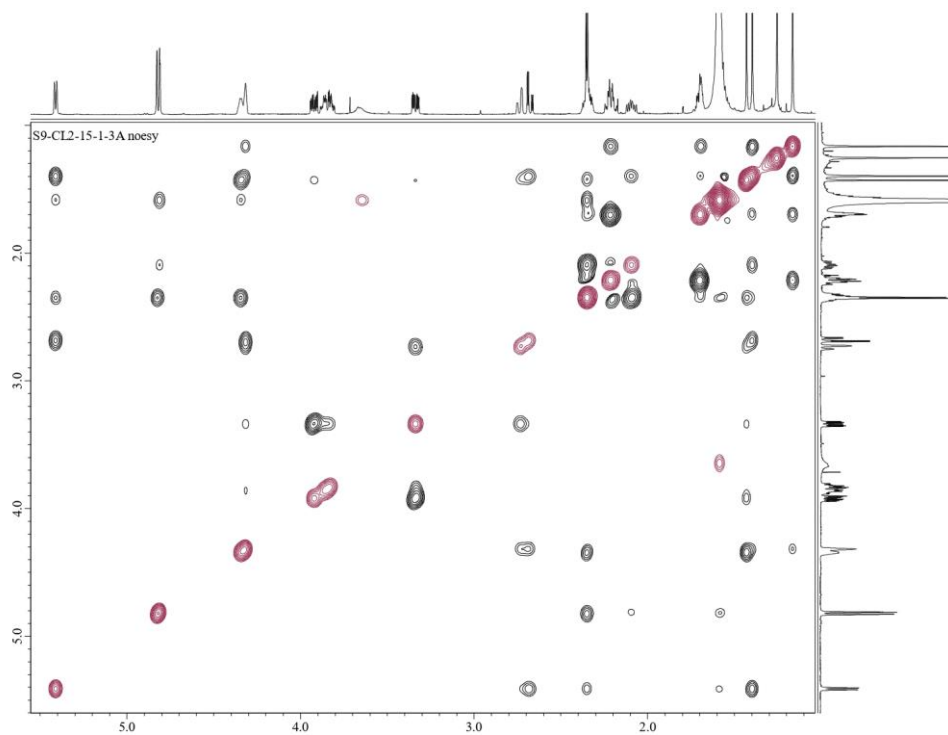

**Figure S8.** NOESY spectrum of compound **1** in  $\text{CDCl}_3$



## Mass Spectrum SmartFormula Report

### Analysis Info

Analysis Name D:\Data\1\1\S9CL21513A2\_000002.d  
 Method broadband first signal  
 Sample Name S9-CL2-15-1-3A-2  
 Comment ESI Positive

9/9/2021 12:39:49 PM  
 Operator: YU HSIAO-CHING  
 Instrument: BRUKER FT-MS solariX

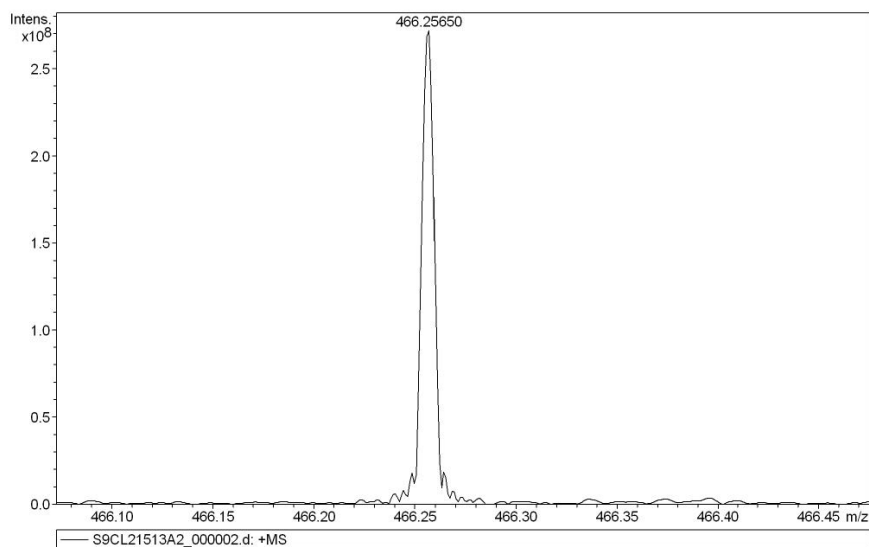

| Meas. m/z | # | Formula                                           | Score  | m/z       | err [mDa] | err [ppm] | mSigma | rdb | e <sup>-</sup> Conf | N-Rule |
|-----------|---|---------------------------------------------------|--------|-----------|-----------|-----------|--------|-----|---------------------|--------|
| 466.25650 | 1 | C <sub>26</sub> H <sub>37</sub> NNaO <sub>5</sub> | 100.00 | 466.25639 | -0.11     | -0.23     | 13.6   | 8.5 | even                | ok     |

**Figure S9. HRESIMS of compound 1a**

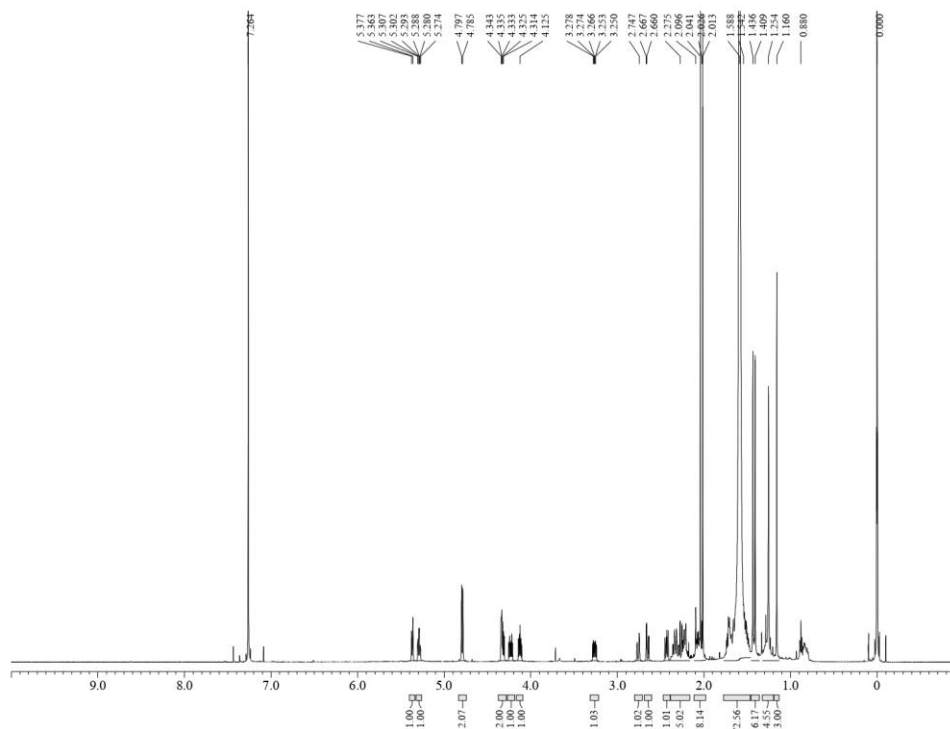

**Figure S10. <sup>1</sup>H NMR spectrum (600MHz) of compound 1a in CDCl<sub>3</sub>**

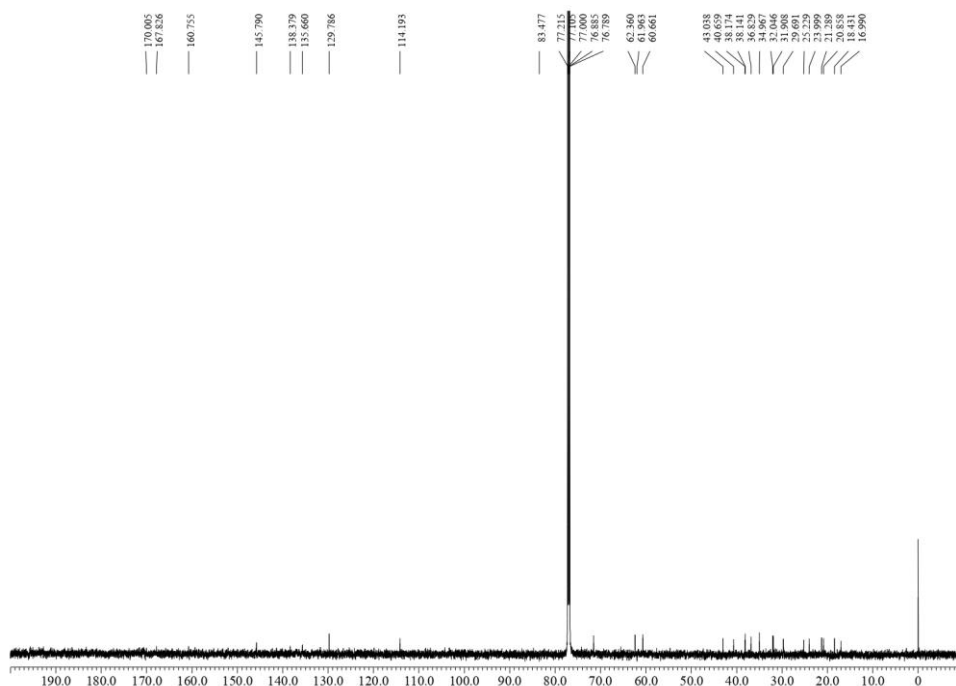

**Figure S11.**  $^{13}\text{C}$  NMR spectrum (150 MHz) of compound **1a** in  $\text{CDCl}_3$

#### Analysis Info

Analysis Name D:\Data\1\S9CL285D\_000004.d  
 Method broadband first signal  
 Sample Name S9-CL2-8-5D  
 Comment ESI Positive

4/12/2021 5:11:11 PM  
 Operator: YU HSIAO-CHING  
 Instrument: BRUKER FT-MS solariX

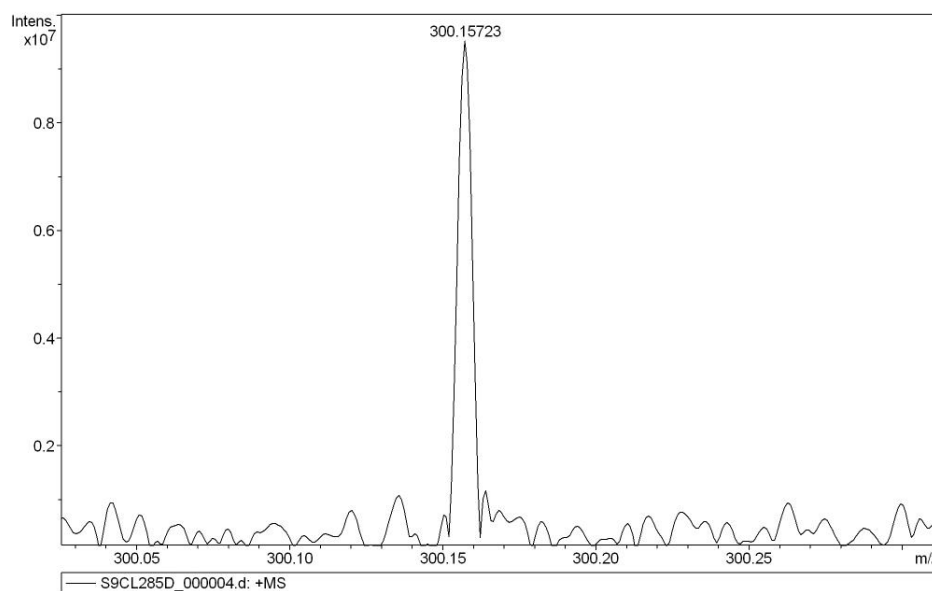

| Meas. m/z | # | Formula                                           | Score  | m/z       | err [mDa] | err [ppm] | mSigma | rdb | e <sup>-</sup> Conf | N-Rule |
|-----------|---|---------------------------------------------------|--------|-----------|-----------|-----------|--------|-----|---------------------|--------|
| 300.15723 | 1 | C <sub>16</sub> H <sub>23</sub> NNaO <sub>3</sub> | 100.00 | 300.15701 | -0.22     | -0.72     | 16.8   | 5.5 | even                | ok     |

**Figure S12.** HRESIMS of compound **2**

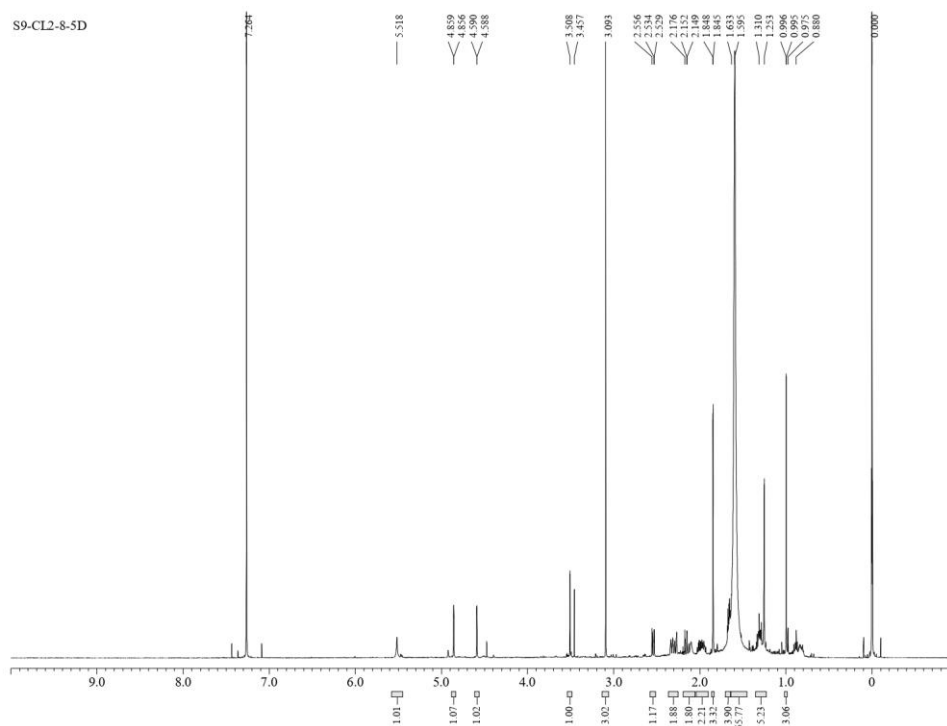

**Figure S13.**  $^1\text{H}$  NMR spectrum (600MHz) of compound **2** in  $\text{CDCl}_3$

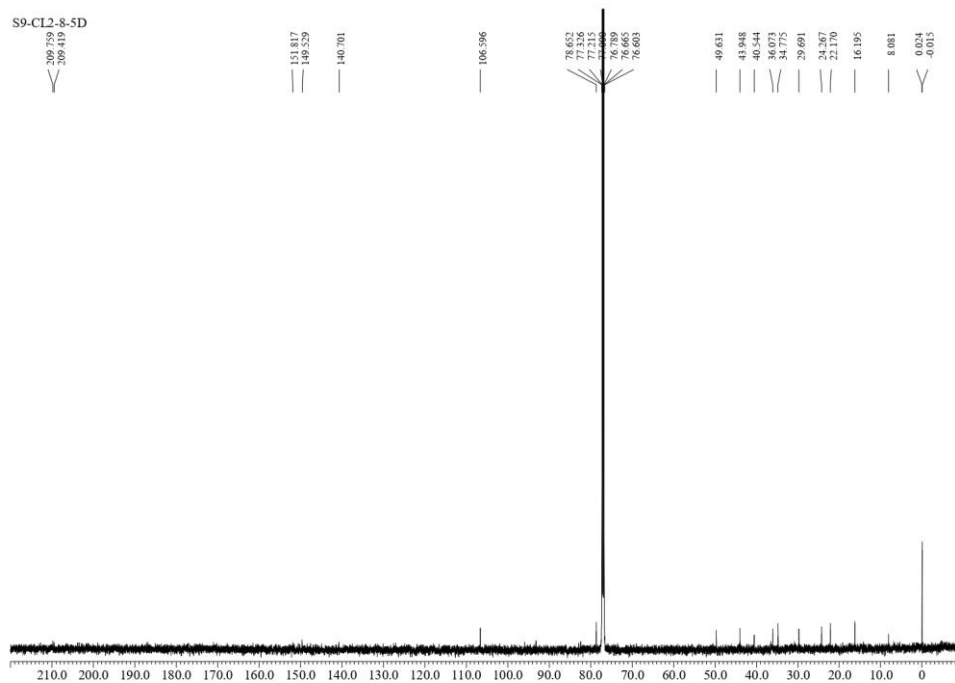

**Figure S14.**  $^{13}\text{C}$  NMR spectrum (150 MHz) of compound **2** in  $\text{CDCl}_3$

Y = 135[deg]  
S9-CL2-8-5D

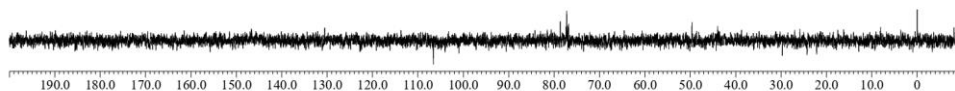

Y = 90[deg]  
S9-CL2-8-5D

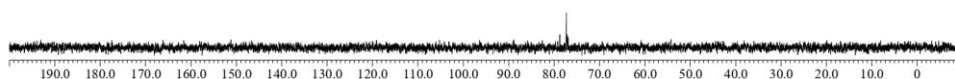

**Figure S15.** DEPT spectrum (150 MHz) of compound **2** in CDCl<sub>3</sub>

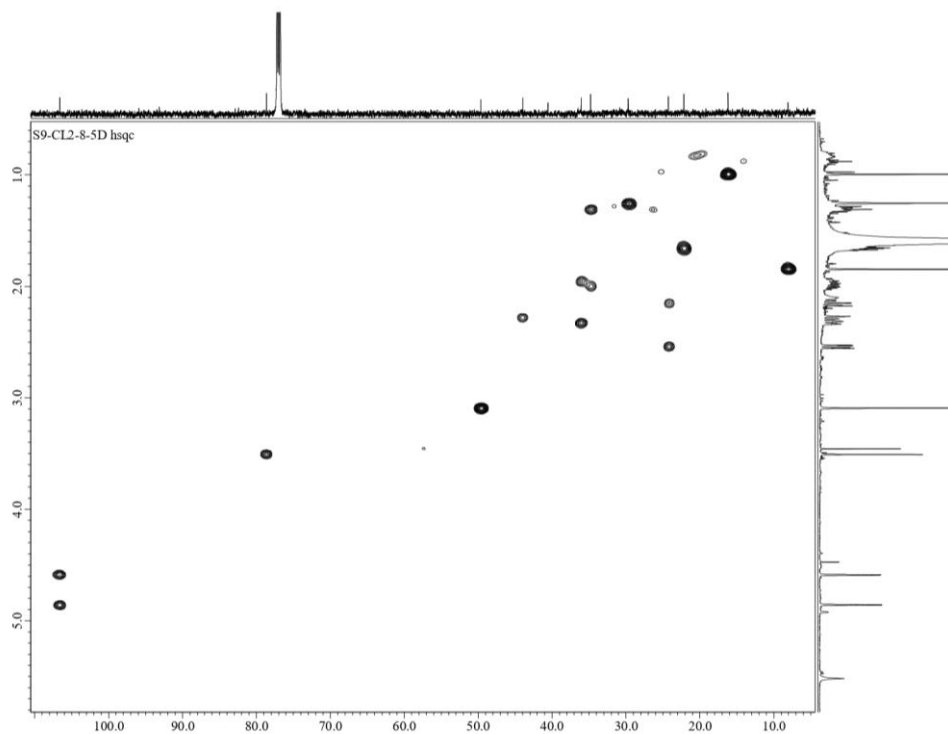

**Figure S16.** HSQC spectrum of compound **2** in CDCl<sub>3</sub>

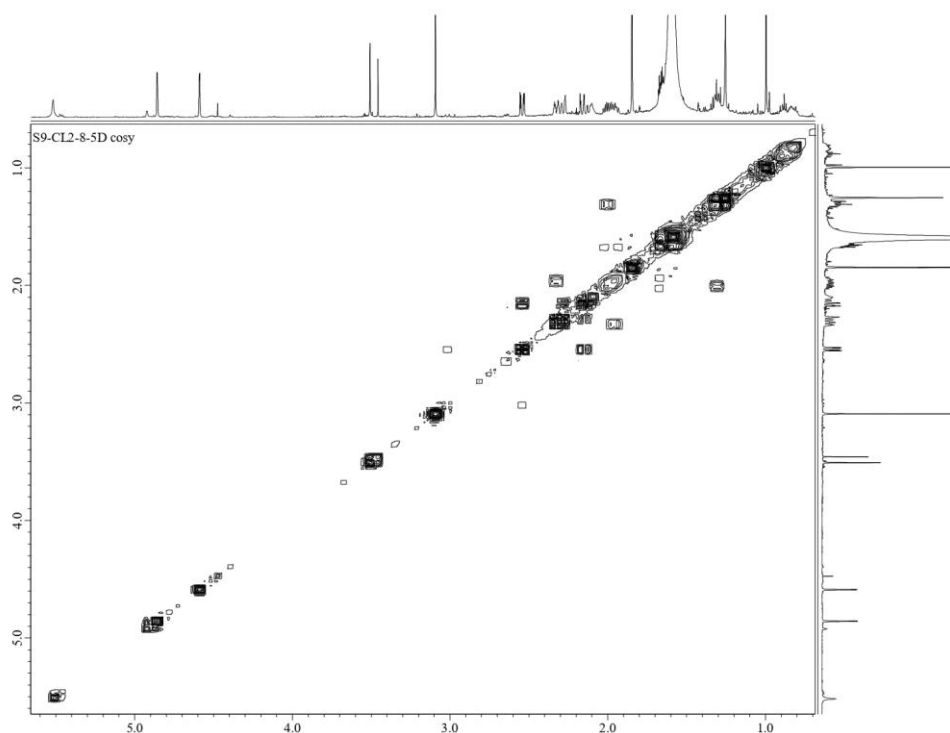

**Figure S17.**  $^1\text{H}$ - $^1\text{H}$  COSY spectrum of compound **2** in  $\text{CDCl}_3$

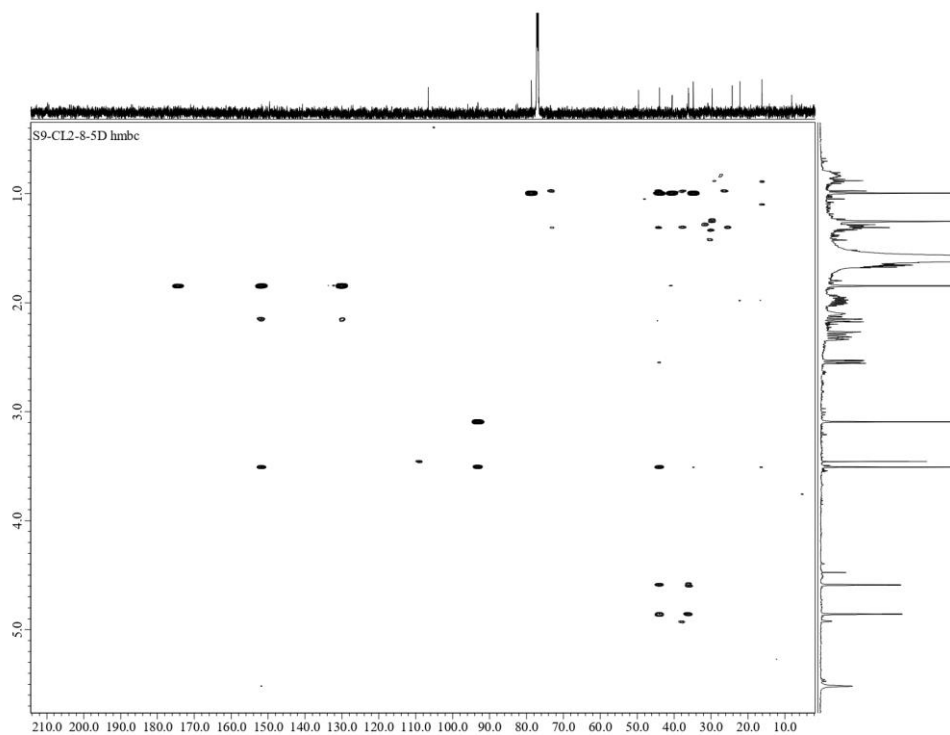

**Figure S18.** HMBC spectrum of compound **2** in  $\text{CDCl}_3$

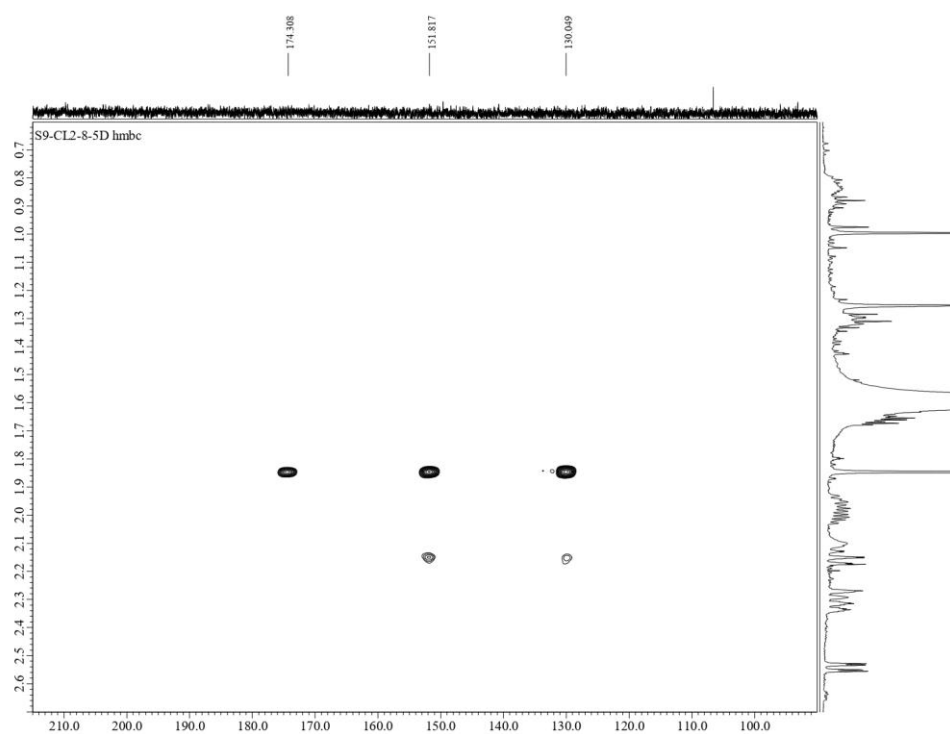

**Figure S19.** The amplificatory HMBC spectrum of compound **2** in  $\text{CDCl}_3$

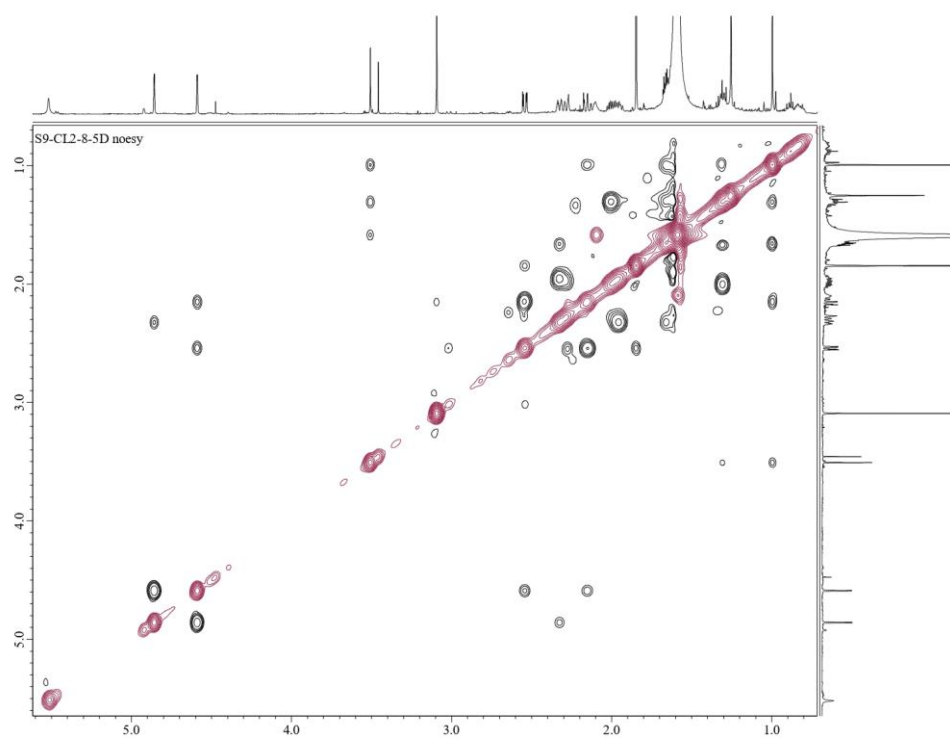

**Figure S20.** NOESY spectrum of compound **2** in  $\text{CDCl}_3$

# Analysis Info

Analysis Name D:\Data\1\S9EA67K\_000002.d  
 Method broadband first signal  
 Sample Name S9-EA-6-7-K  
 Comment ESI Positive

3/26/2021 11:55:00 AM  
 Operator: YU HSIAO-CHING  
 Instrument: BRUKER FT-MS solariX

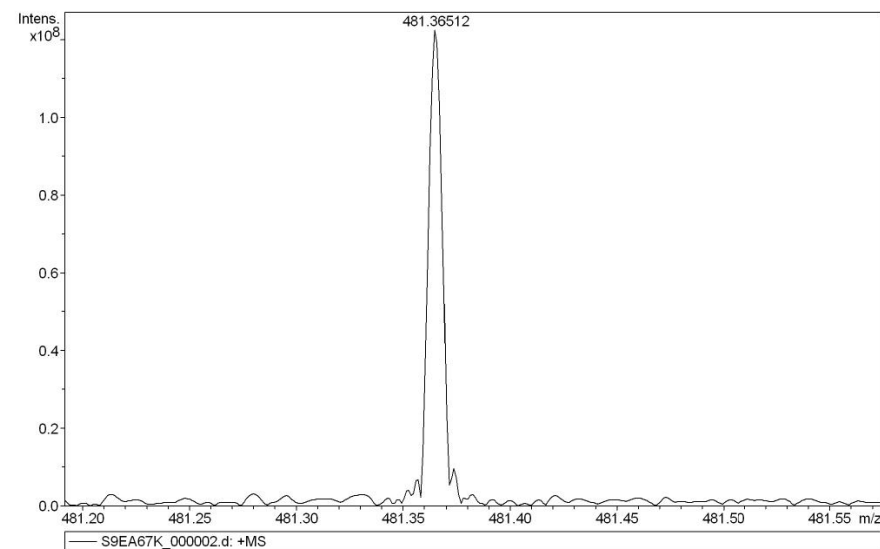

| Meas. m/z | # | Formula                                          | Score  | m/z       | err [mDa] | err [ppm] | mSigma | rdb | e <sup>-</sup> Conf | N-Rule |
|-----------|---|--------------------------------------------------|--------|-----------|-----------|-----------|--------|-----|---------------------|--------|
| 481.36512 | 1 | C <sub>30</sub> H <sub>50</sub> NaO <sub>3</sub> | 100.00 | 481.36522 | 0.09      | 0.20      | 7.9    | 5.5 | even                | ok     |

Figure S21. HRESIMS of compound 3

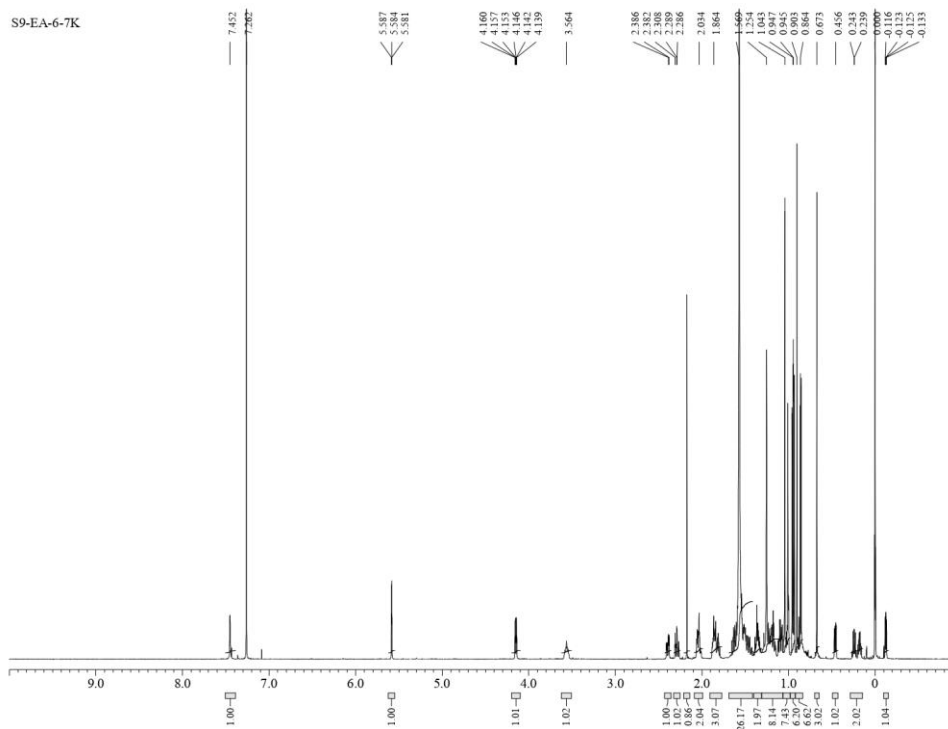

Figure S22. <sup>1</sup>H NMR spectrum (600MHz) of compound 3 in CDCl<sub>3</sub>

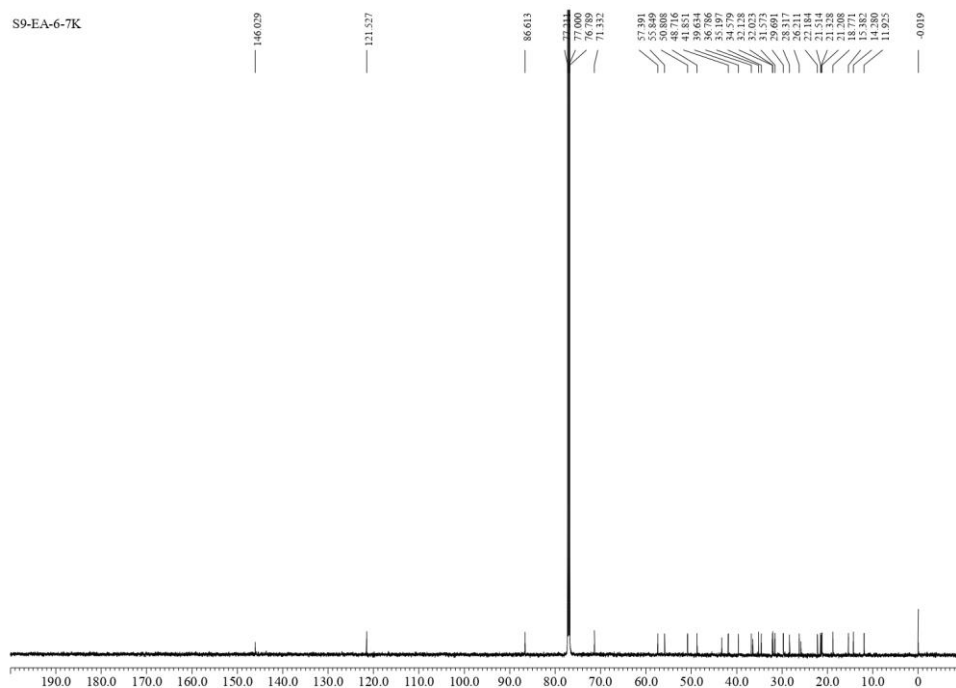

**Figure S23.**  $^{13}\text{C}$  NMR spectrum (150 MHz) of compound **3** in  $\text{CDCl}_3$

Y = 135[deg]  
S9-EA-6-7K

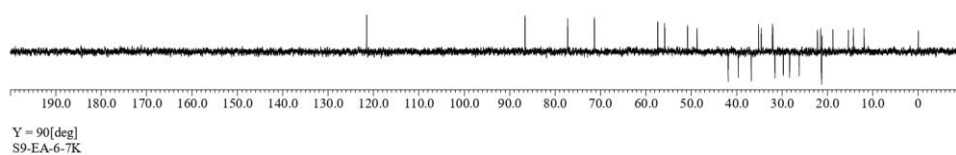

**Figure S24.** DEPT spectrum (150 MHz) of compound **3** in  $\text{CDCl}_3$



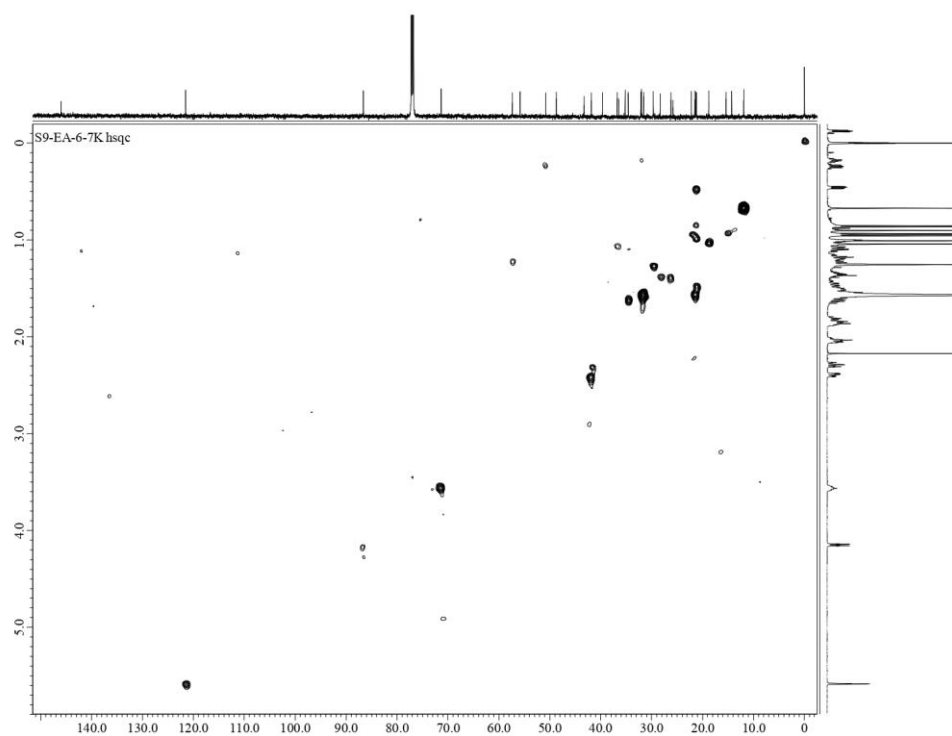

**Figure S25.** HSQC spectrum of compound **3** in CDCl<sub>3</sub>

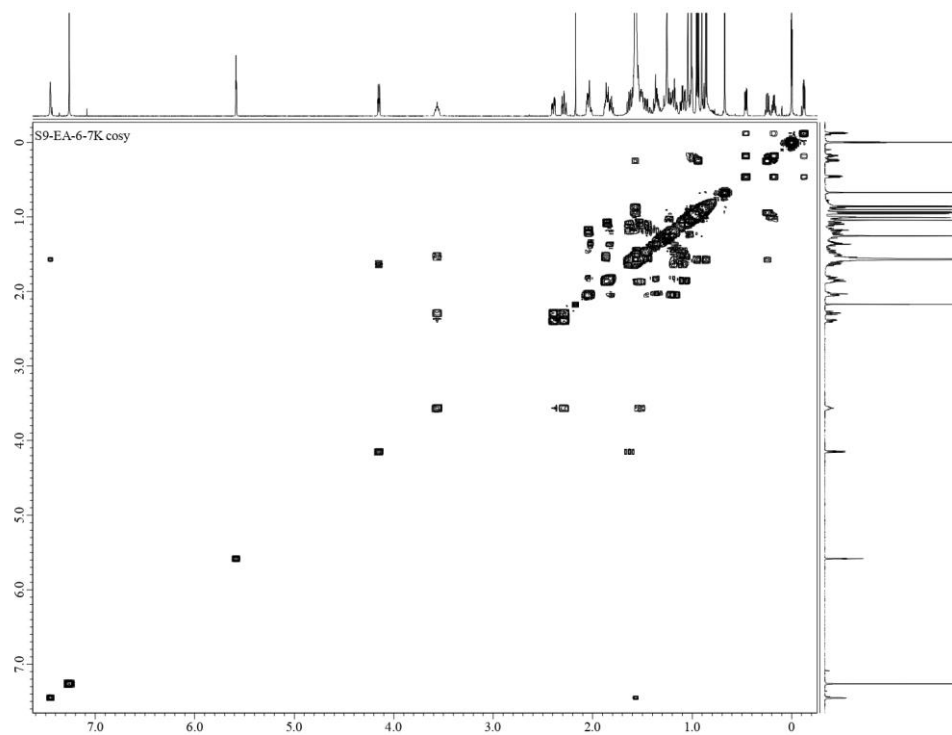

**Figure S26.** <sup>1</sup>H-<sup>1</sup>H COSY spectrum of compound **3** in CDCl<sub>3</sub>

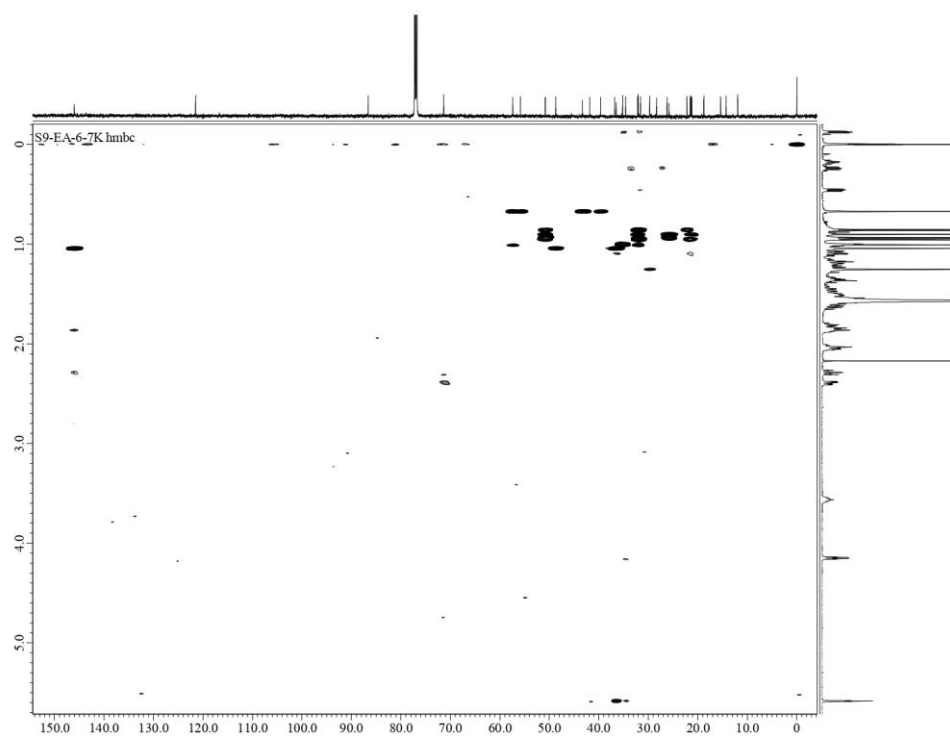

**Figure S27.** HMBC spectrum of compound **3** in  $\text{CDCl}_3$

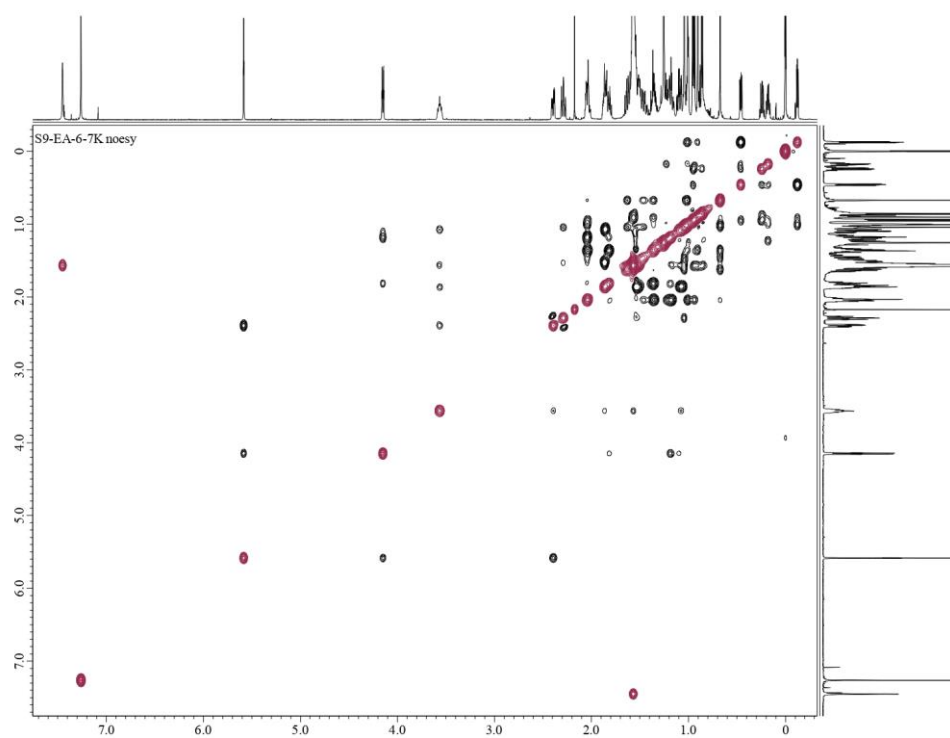

**Figure S28.** NOESY spectrum of compound **3** in  $\text{CDCl}_3$

# **Analysis Info**

Analysis Name D:\Data\1\S9EA67J\_000003.d  
 Method broadband first signal  
 Sample Name S9-EA-6-7-J  
 Comment ESI Positive

3/26/2021 11:49:41 AM  
 Operator: YU HSIAO-CHING  
 Instrument: BRUKER FT-MS solariX

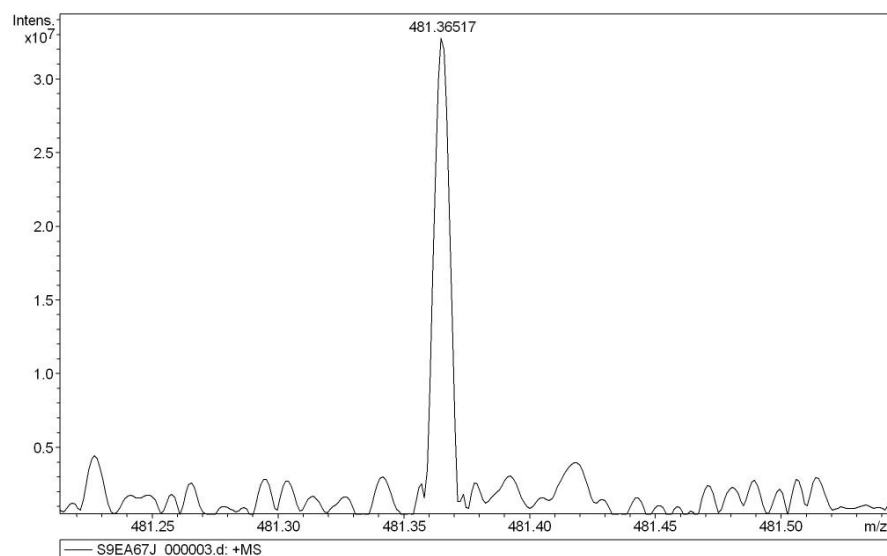

| Meas. m/z | # | Formula                                          | Score  | m/z       | err [mDa] | err [ppm] | mSigma | rdb | e <sup>-</sup> Conf | N-Rule |
|-----------|---|--------------------------------------------------|--------|-----------|-----------|-----------|--------|-----|---------------------|--------|
| 481.36517 | 1 | C <sub>30</sub> H <sub>50</sub> NaO <sub>3</sub> | 100.00 | 481.36522 | 0.05      | 0.10      | 37.5   | 5.5 | even                | ok     |

**Figure S29.** HRESIMS of compound **4**

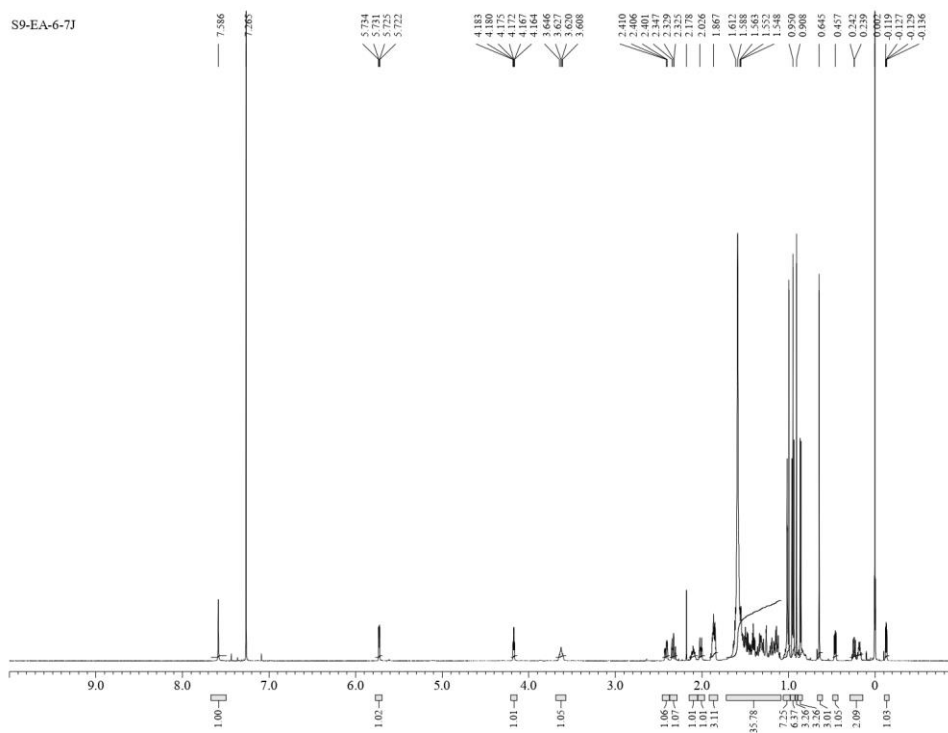

**Figure S30.** <sup>1</sup>H NMR spectrum (600MHz) of compound **4** in CDCl<sub>3</sub>

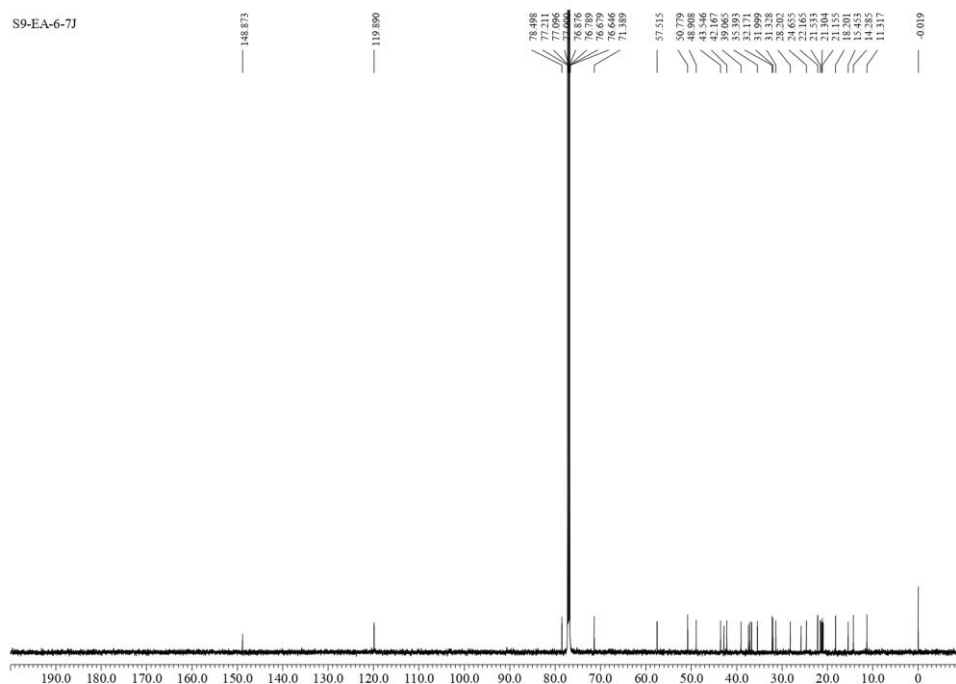

**Figure S31.**  $^{13}\text{C}$  NMR spectrum (150 MHz) of compound **4** in  $\text{CDCl}_3$

Y = 135[deg]  
S9-EA-6-7J

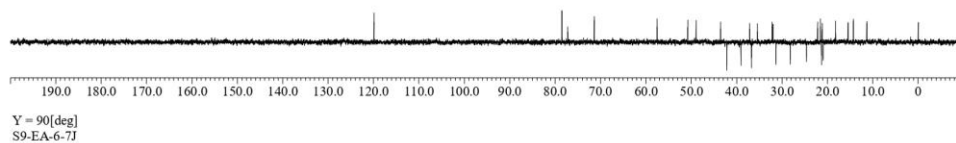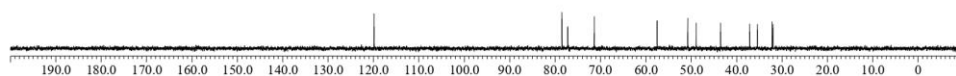

**Figure S32.** DEPT spectrum (150 MHz) of compound **4** in  $\text{CDCl}_3$

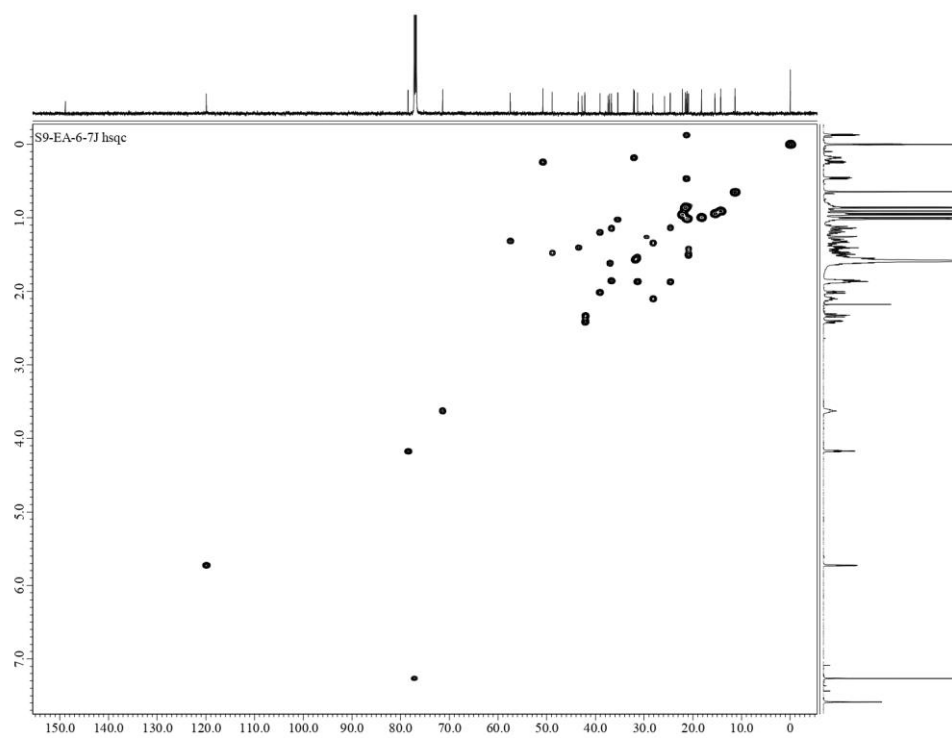

**Figure S33.** HSQC spectrum of compound **4** in CDCl<sub>3</sub>

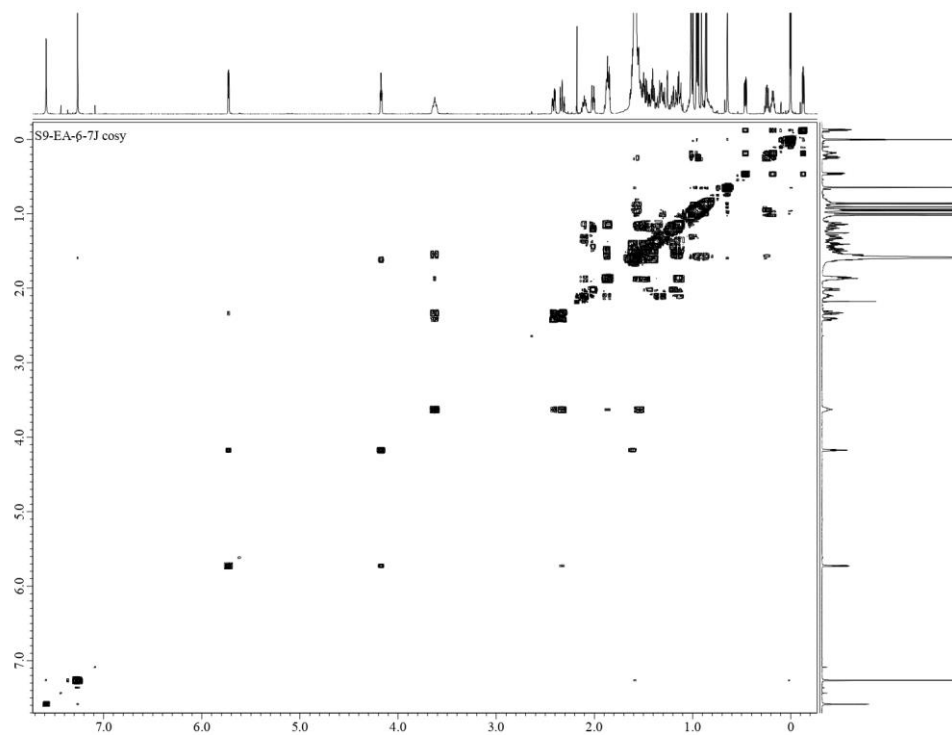

**Figure S34.** <sup>1</sup>H-<sup>1</sup>H COSY spectrum of compound **4** in CDCl<sub>3</sub>

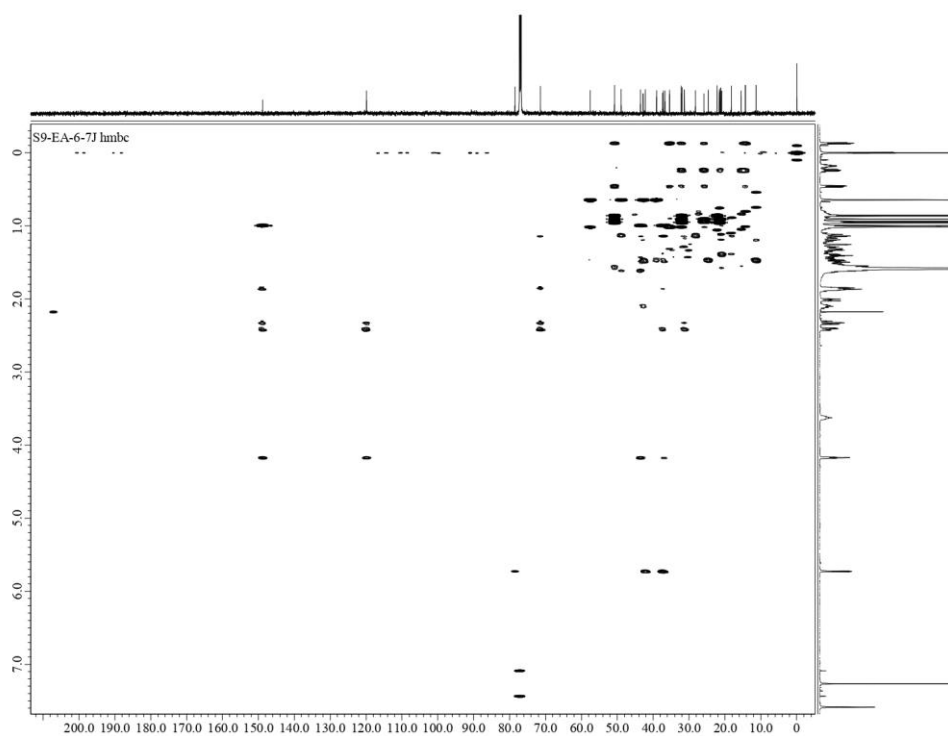

**Figure S35.** HMBC spectrum of compound **4** in CDCl<sub>3</sub>

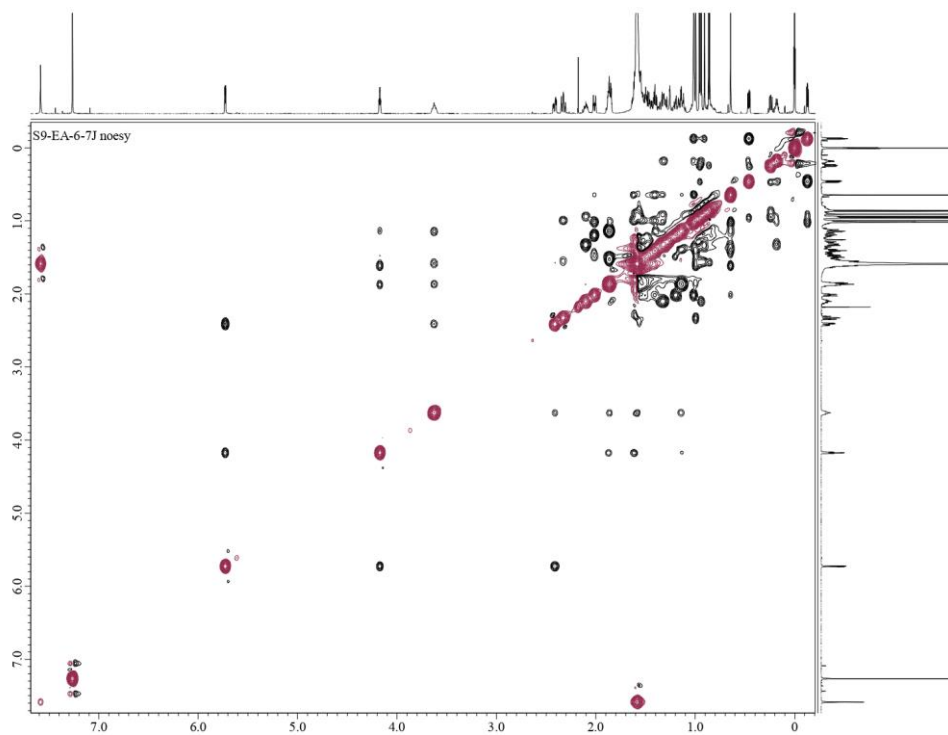

**Figure S36.** NOESY spectrum of compound **4** in CDCl<sub>3</sub>

**Analysis Info**

Analysis Name D:\Data\1\S9EA67H\_000002.d  
Method broadband first signal  
Sample Name S9-EA-6-7-H  
Comment ESI Positive

3/26/2021 11:35:26 AM  
Operator: YU HSIAO-CHING  
Instrument: BRUKER FT-MS solariX

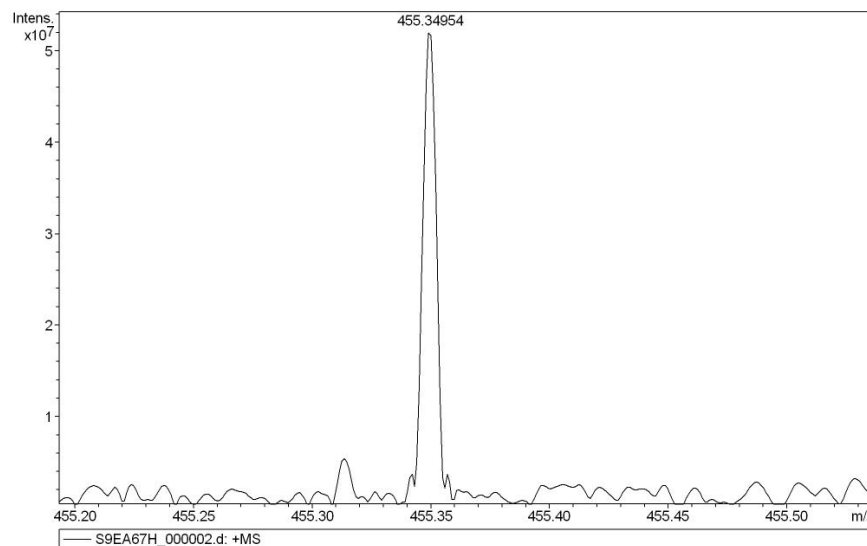

| Meas. m/z | # | Formula                                          | Score  | m/z       | err [mDa] | err [ppm] | mSigma | rdb | e <sup>-</sup> Conf | N-Rule |
|-----------|---|--------------------------------------------------|--------|-----------|-----------|-----------|--------|-----|---------------------|--------|
| 455.34954 | 1 | C <sub>28</sub> H <sub>48</sub> NaO <sub>3</sub> | 100.00 | 455.34957 | 0.02      | 0.05      | 36.2   | 4.5 | even                | ok     |

**Figure S37.** HRESIMS of compound **5**

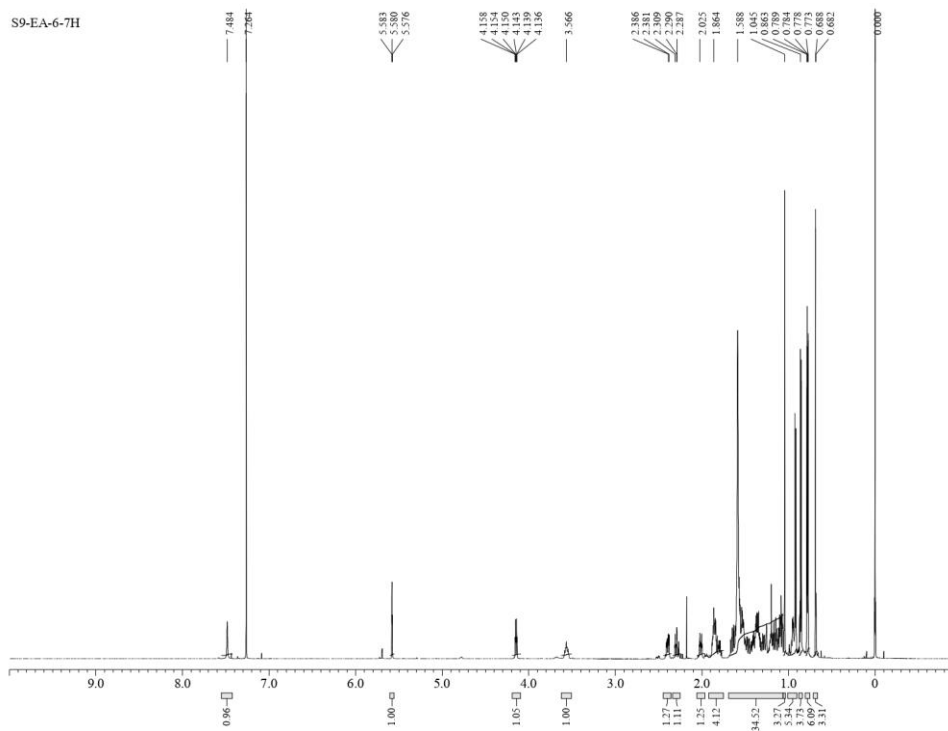

**Figure S38.** <sup>1</sup>H NMR spectrum (600MHz) of compound **5** in CDCl<sub>3</sub>

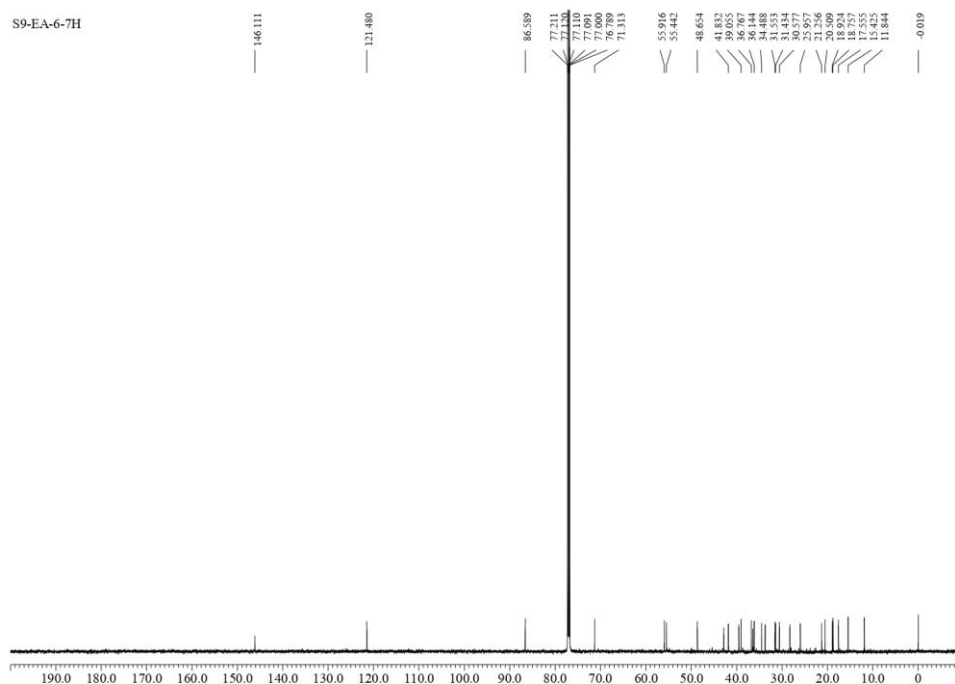

**Figure S39.**  $^{13}\text{C}$  NMR spectrum (150 MHz) of compound **5** in  $\text{CDCl}_3$

Y = 135[deg]  
S9-EA-6-7H

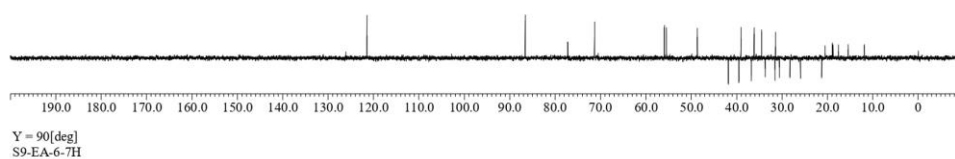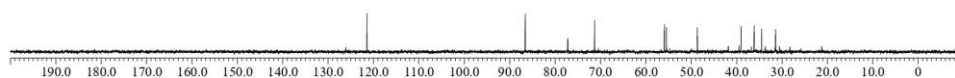

**Figure S40.** DEPT spectrum (150 MHz) of compound **5** in  $\text{CDCl}_3$



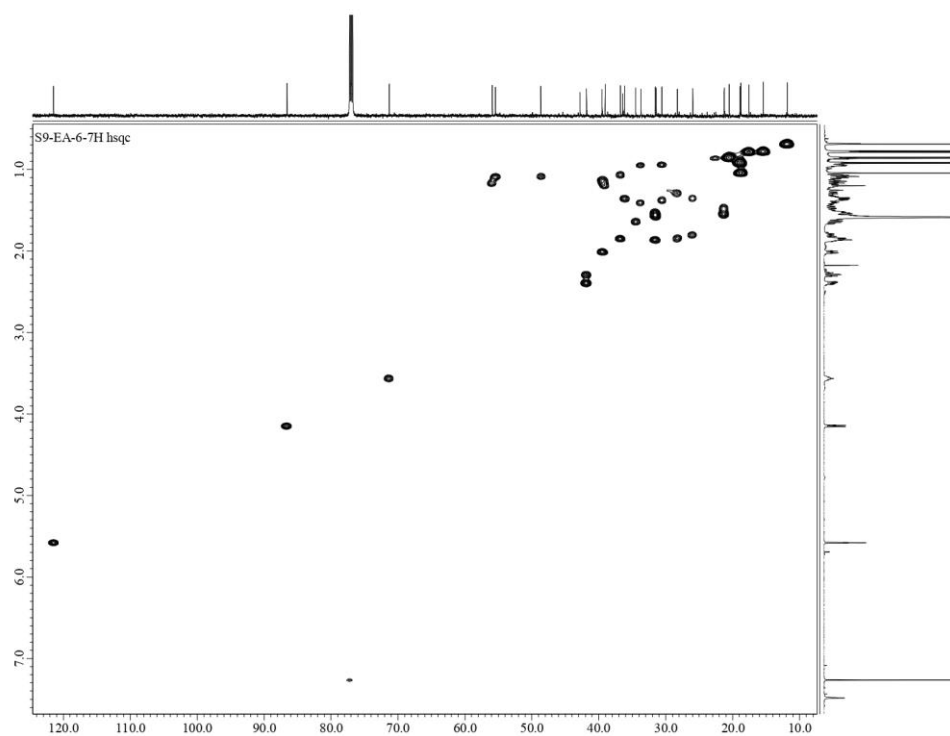

**Figure S41.** HSQC spectrum of compound **5** in CDCl<sub>3</sub>

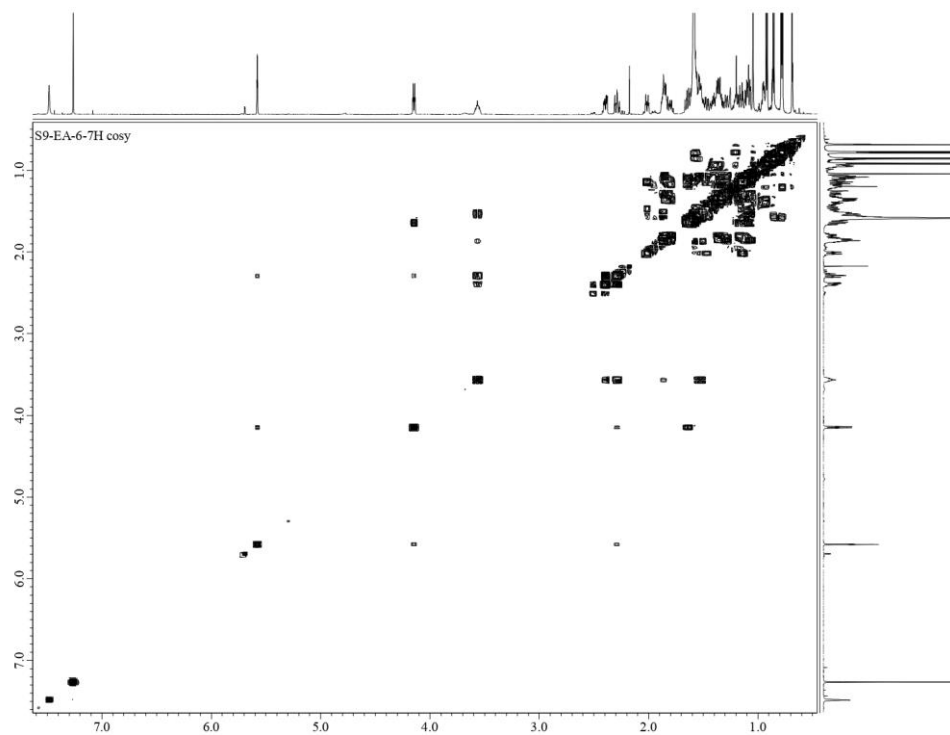

**Figure S42.** <sup>1</sup>H-<sup>1</sup>H COSY spectrum of compound **5** in CDCl<sub>3</sub>

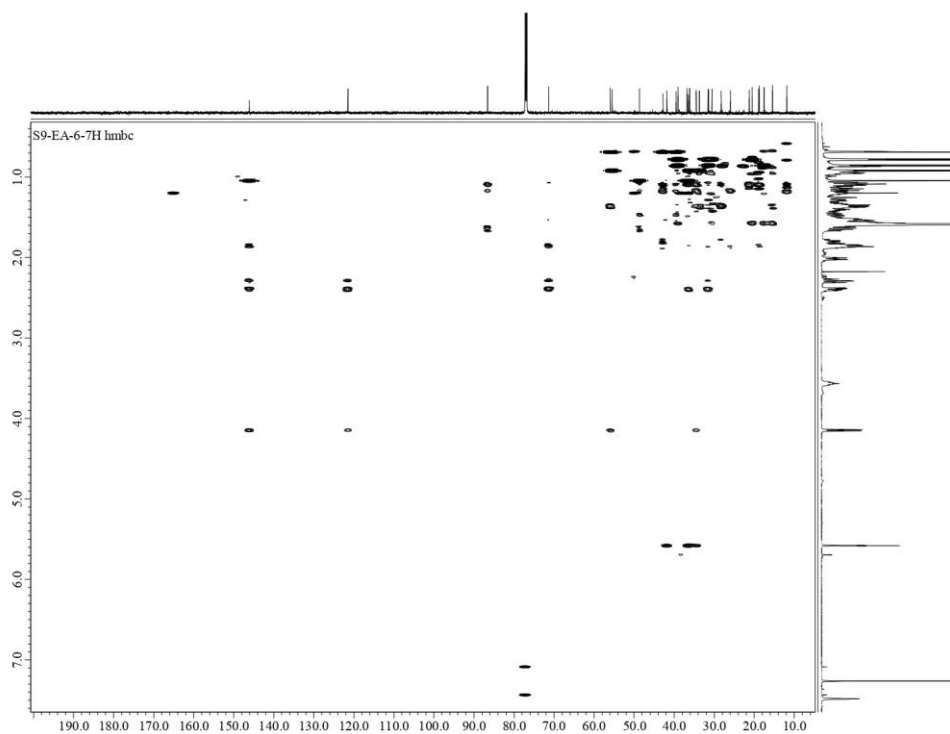

**Figure S43.** HMBC spectrum of compound **5** in  $\text{CDCl}_3$

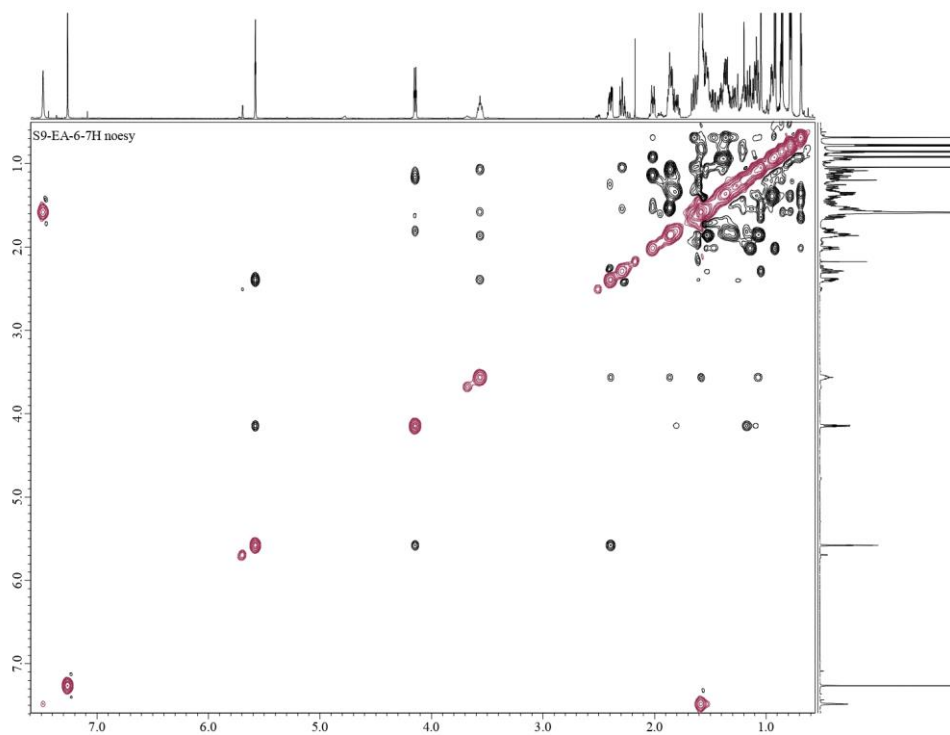

**Figure S44.** NOESY spectrum of compound **5** in  $\text{CDCl}_3$

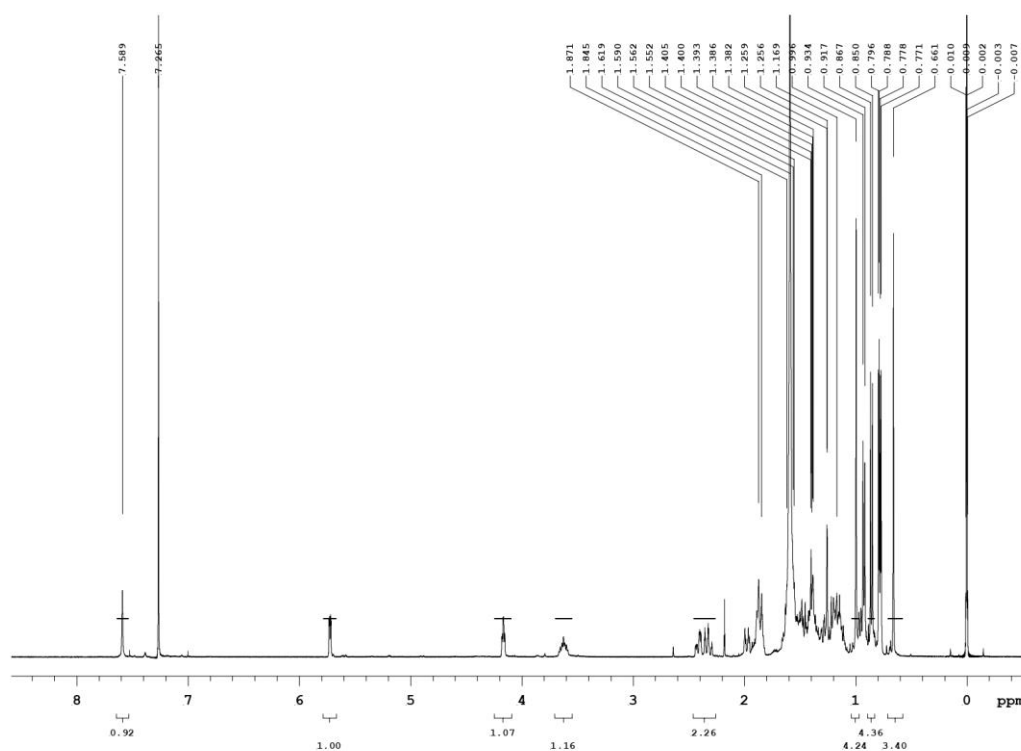

**Figure S45.**  $^1\text{H}$  NMR spectrum (400MHz) of compound **6** in  $\text{CDCl}_3$

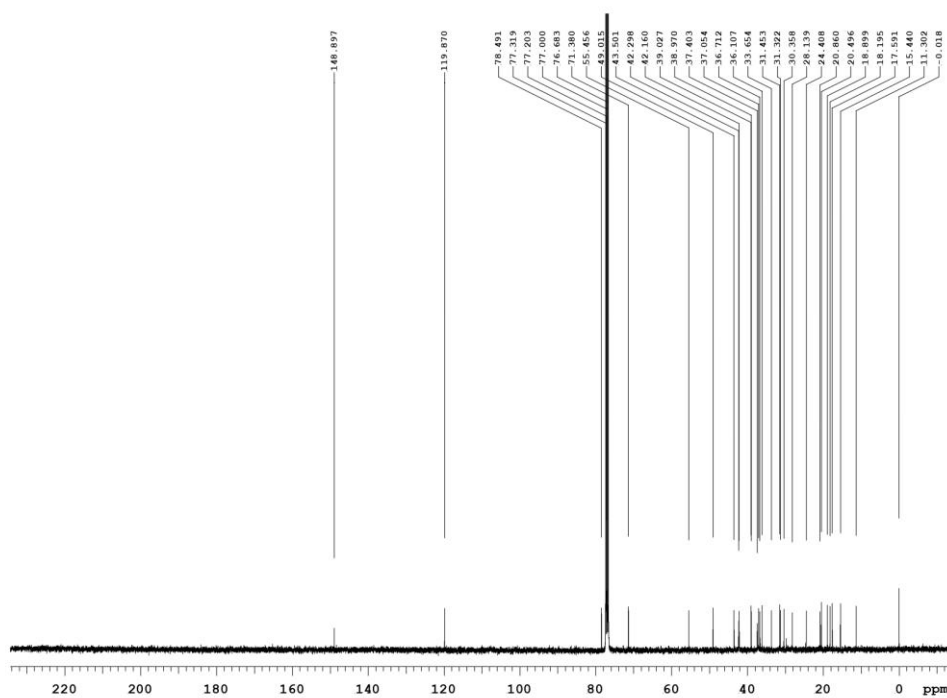

**Figure S46.**  $^{13}\text{C}$  NMR spectrum (100 MHz) of compound **6** in  $\text{CDCl}_3$

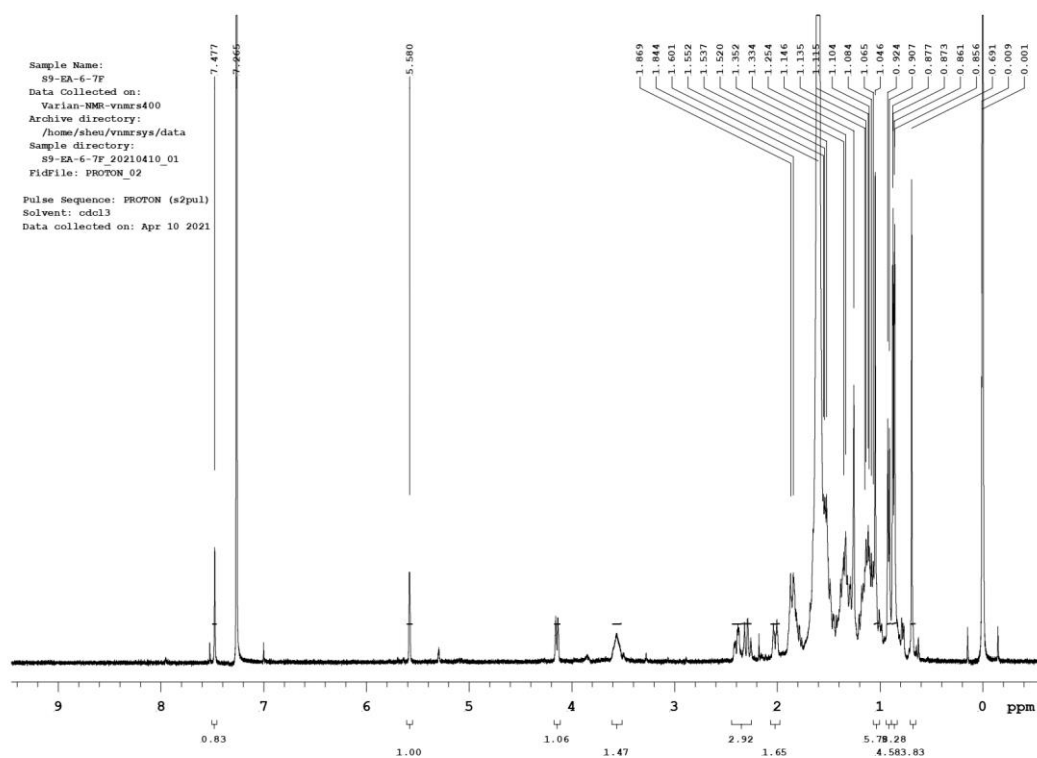

**Figure S47.**  $^1\text{H}$  NMR spectrum (400MHz) of compound **7** in  $\text{CDCl}_3$

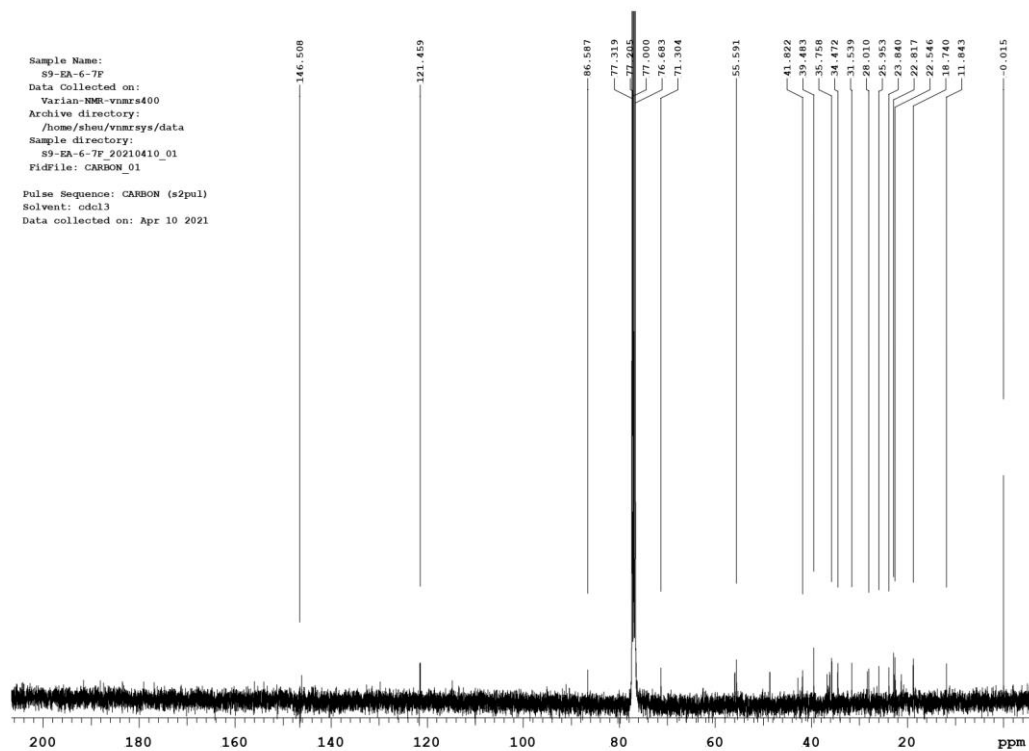

**Figure S48.**  $^{13}\text{C}$  NMR spectrum (100 MHz) of compound **7** in  $\text{CDCl}_3$

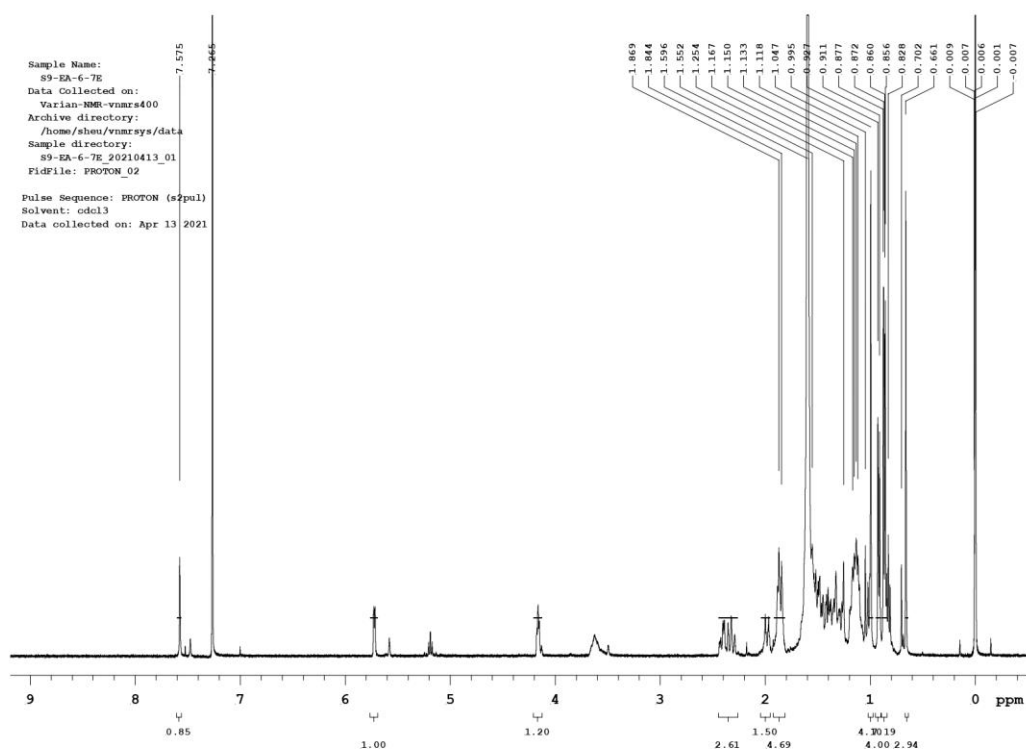

**Figure S49.**  $^1\text{H}$  NMR spectrum (400MHz) of compound **8** in  $\text{CDCl}_3$

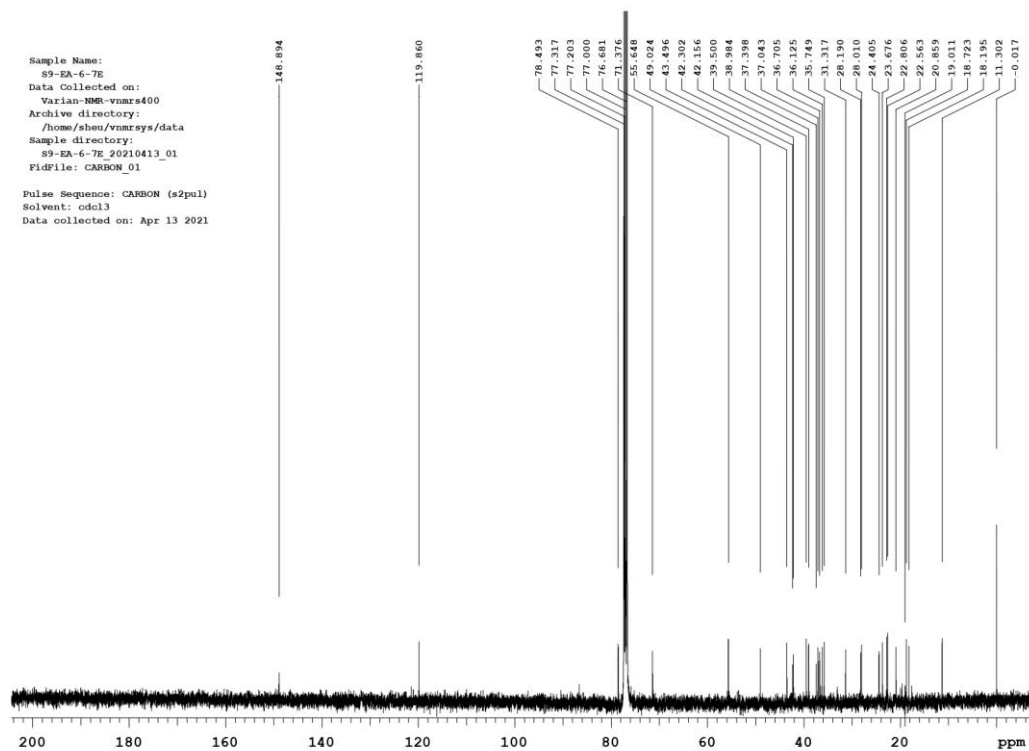

**Figure S50.**  $^{13}\text{C}$  NMR spectrum (100 MHz) of compound **8** in  $\text{CDCl}_3$

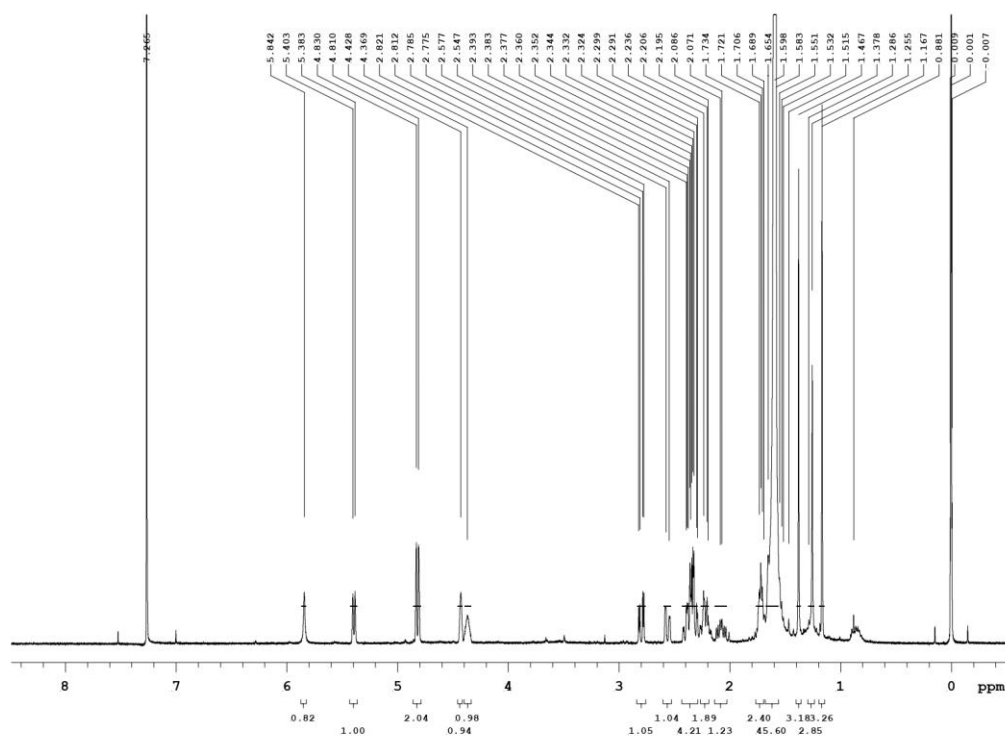

**Figure S51.**  $^1\text{H}$  NMR spectrum (400MHz) of compound **9** in  $\text{CDCl}_3$

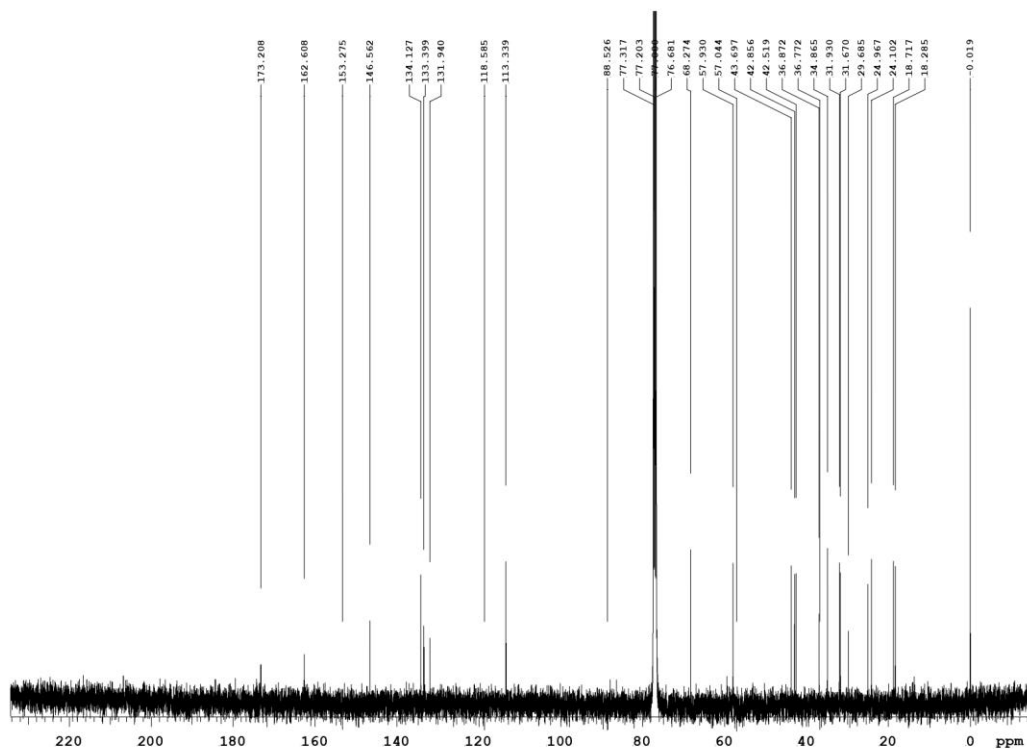

**Figure S52.**  $^{13}\text{C}$  NMR spectrum (100 MHz) of compound **9** in  $\text{CDCl}_3$

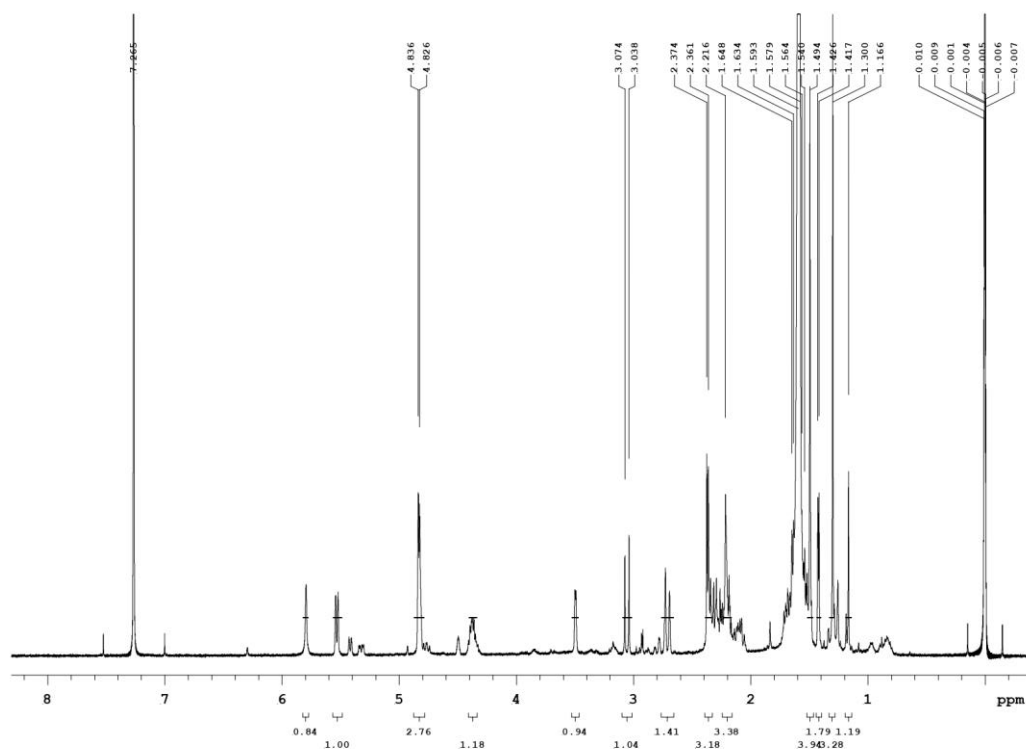

**Figure S53.** <sup>1</sup>H NMR spectrum (400MHz) of compound **10** in CDCl<sub>3</sub>

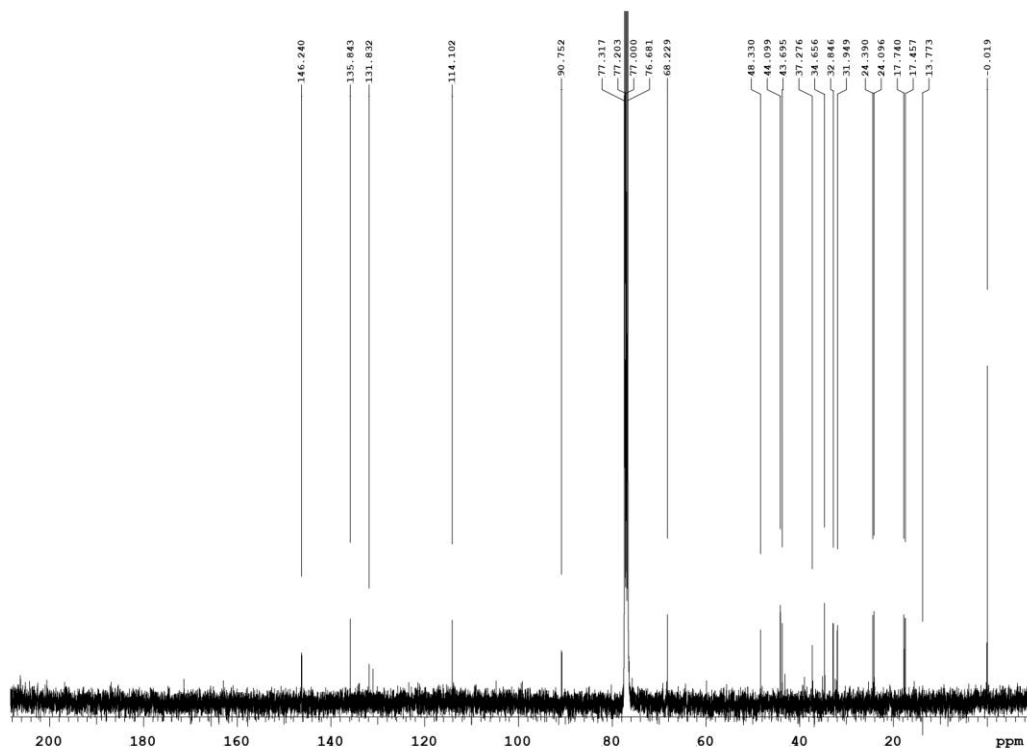

**Figure S54.** <sup>13</sup>C NMR spectrum (100 MHz) of compound **10** in CDCl<sub>3</sub>

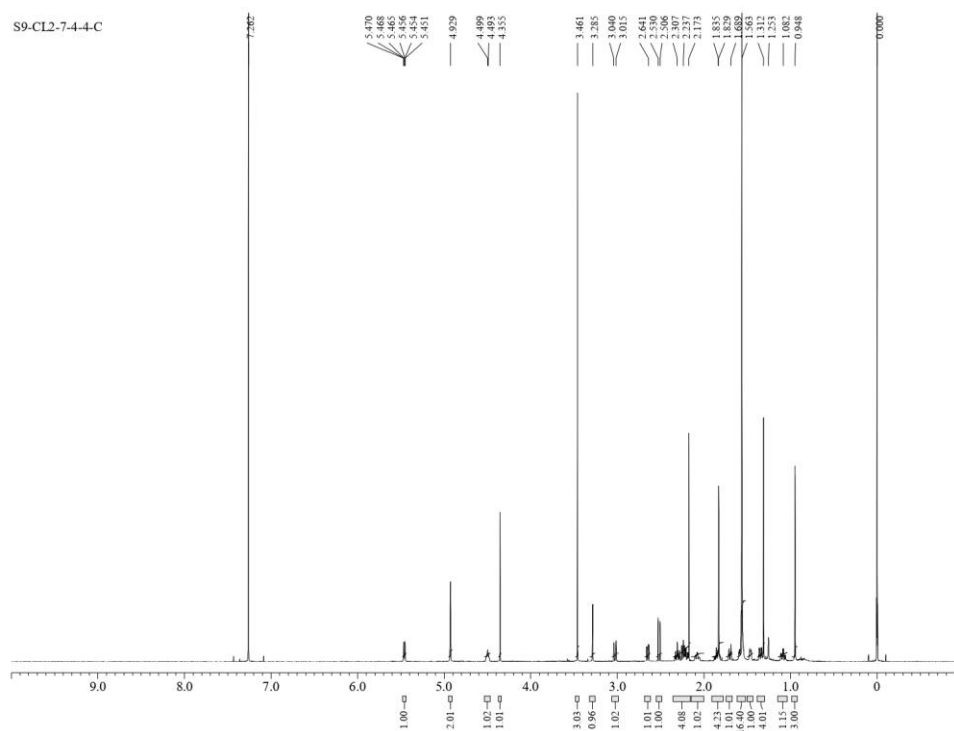

**Figure S55.**  $^1\text{H}$  NMR spectrum (600MHz) of compound **11** in  $\text{CDCl}_3$

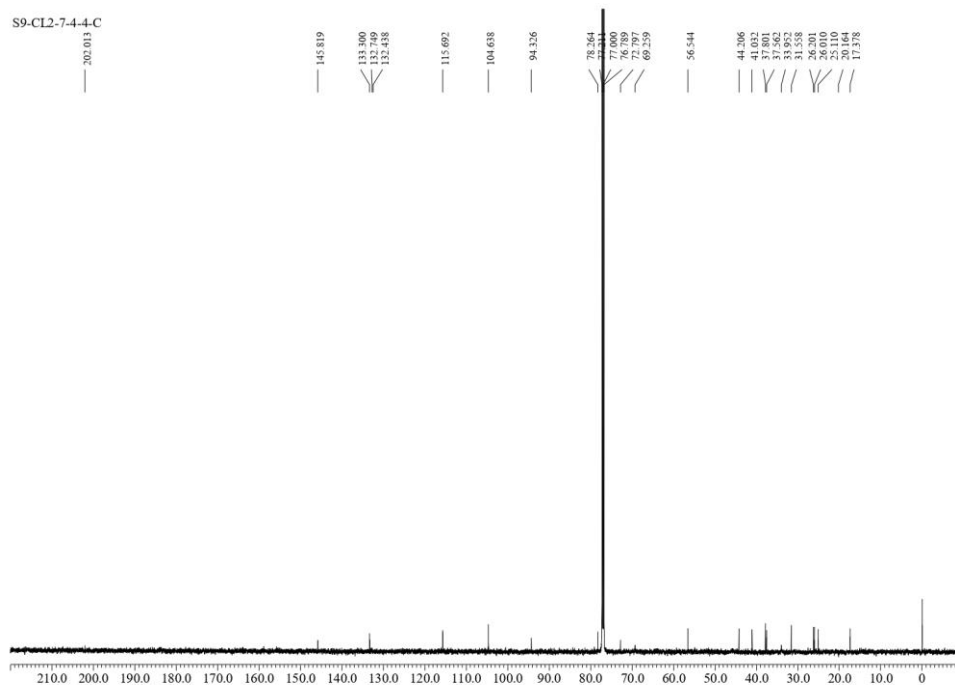

**Figure S56.**  $^{13}\text{C}$  NMR spectrum (150 MHz) of compound **11** in  $\text{CDCl}_3$



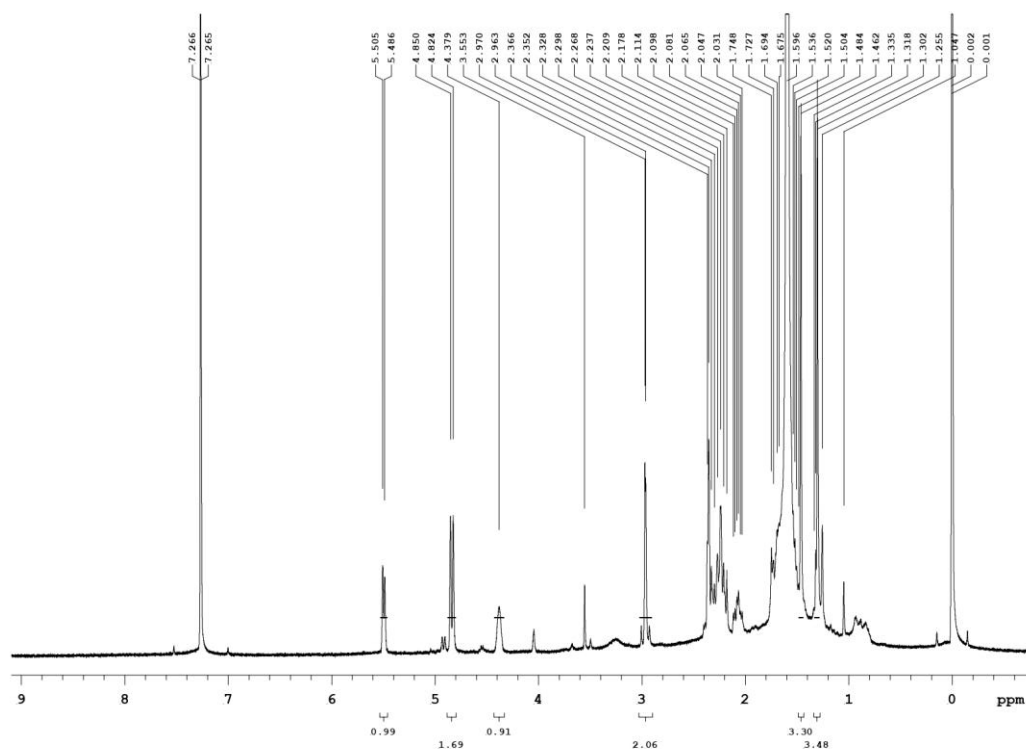

**Figure S57.** <sup>1</sup>H NMR spectrum (400MHz) of compound **12** in CDCl<sub>3</sub>

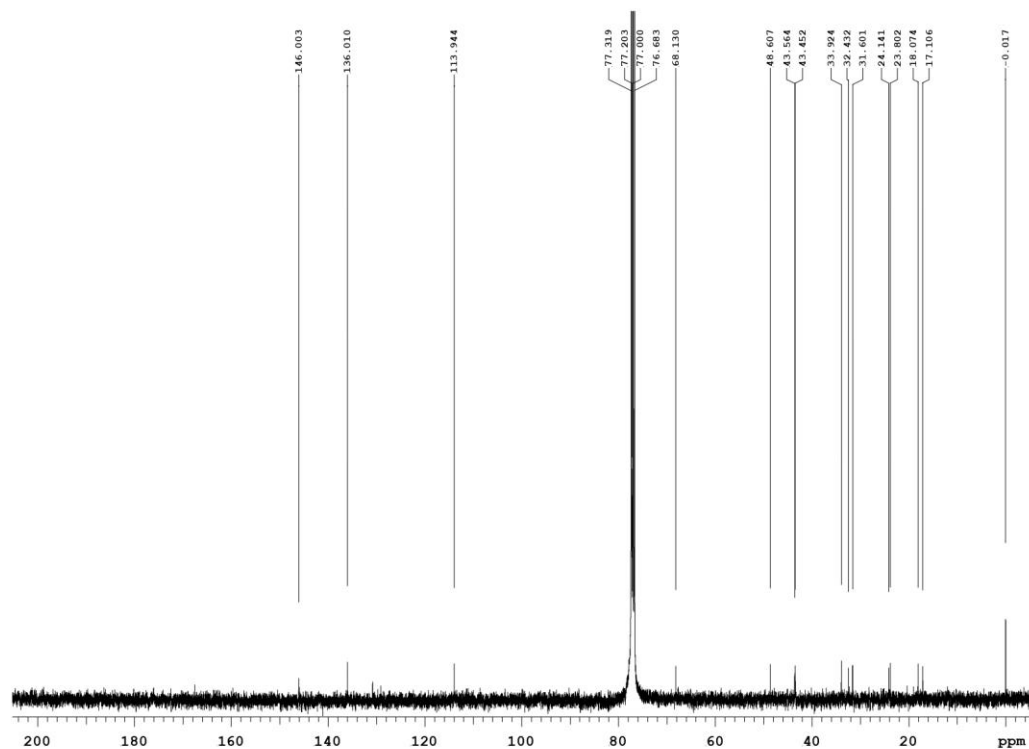

**Figure S58.** <sup>13</sup>C NMR spectrum (100 MHz) of compound **12** in CDCl<sub>3</sub>

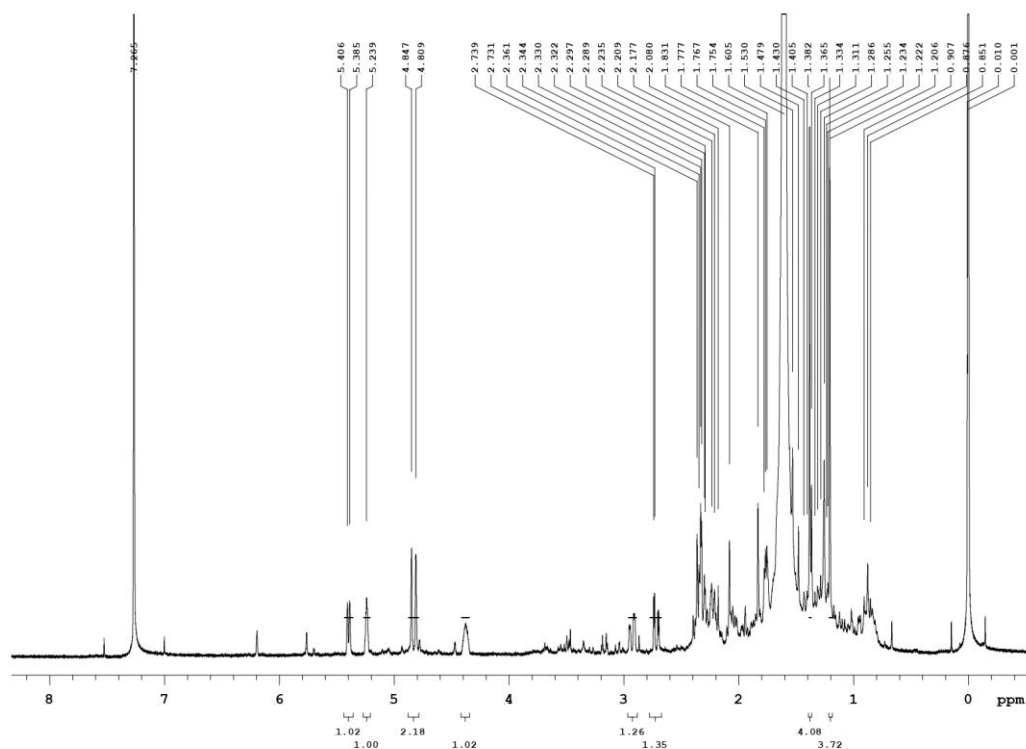

**Figure S59.**  $^1\text{H}$  NMR spectrum (400MHz) of compound **13** in  $\text{CDCl}_3$

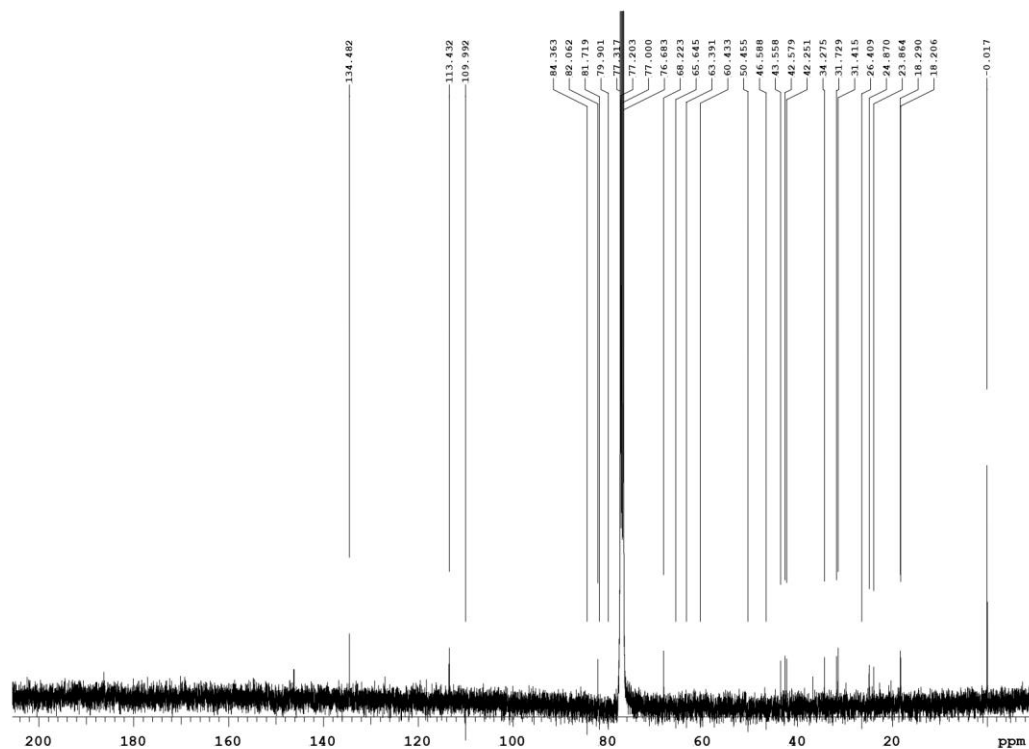

**Figure S60.**  $^{13}\text{C}$  NMR spectrum (100 MHz) of compound **13** in  $\text{CDCl}_3$

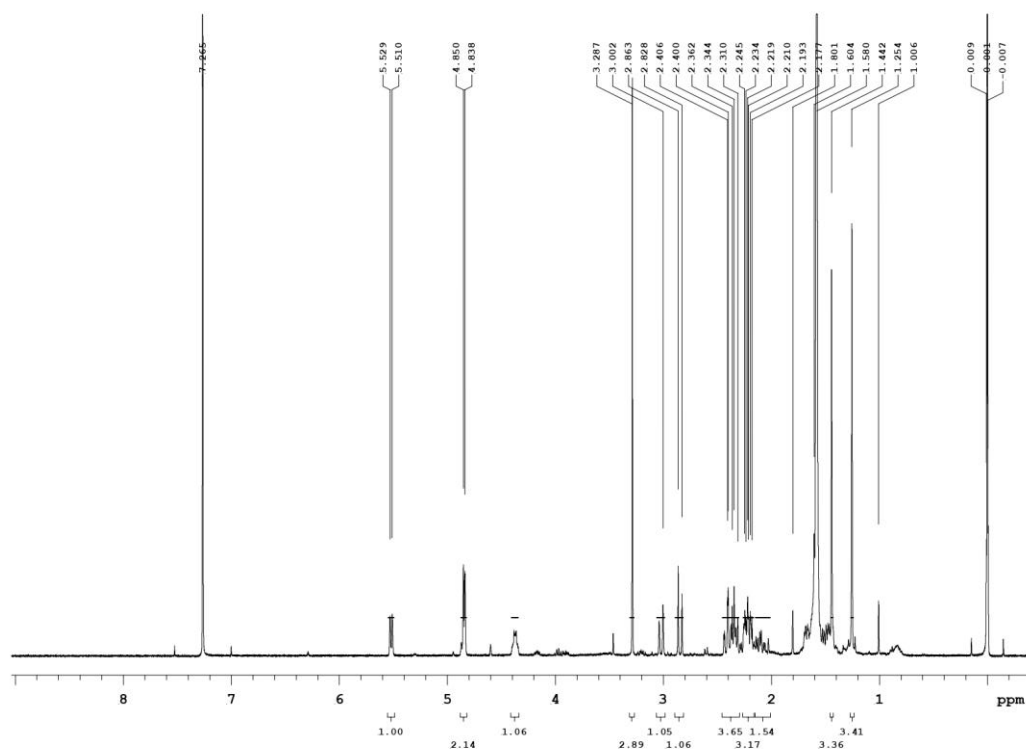

**Figure S61.** <sup>1</sup>H NMR spectrum (400MHz) of compound **14** in CDCl<sub>3</sub>

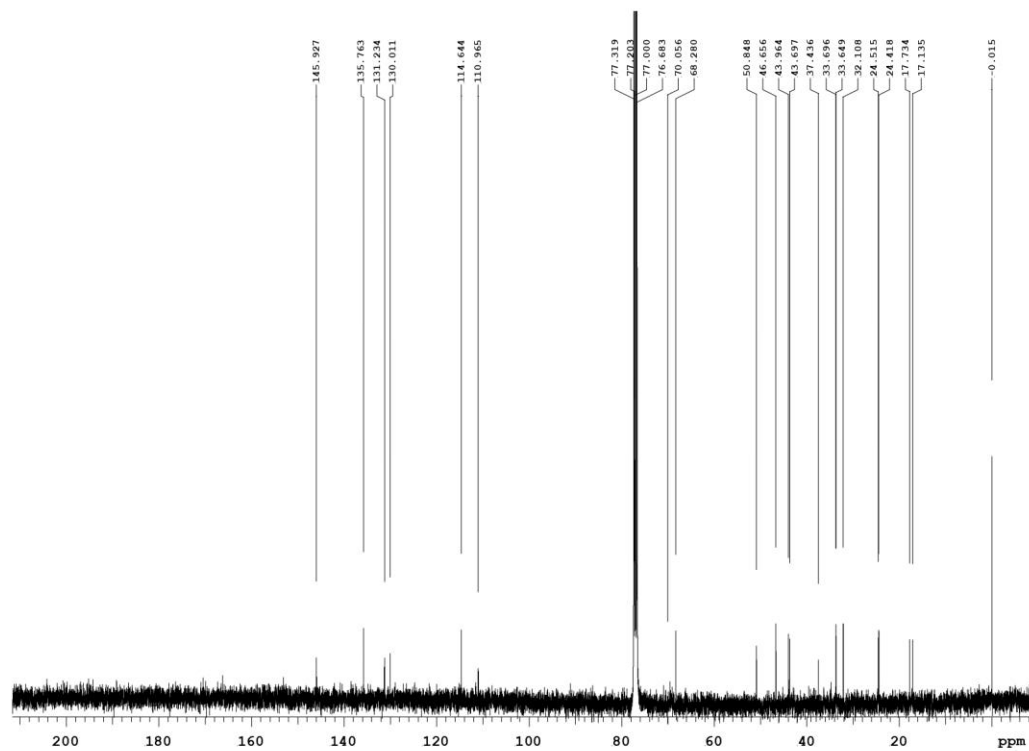

**Figure S62.** <sup>13</sup>C NMR spectrum (100 MHz) of compound **14** in CDCl<sub>3</sub>

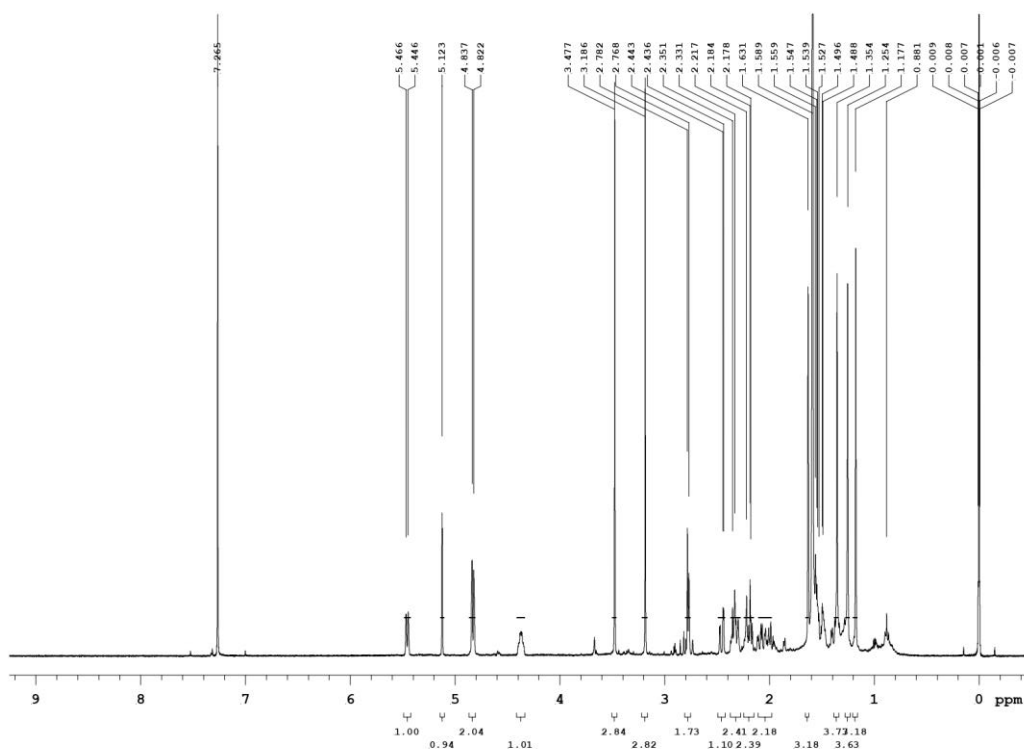

**Figure S63.**  $^1\text{H}$  NMR spectrum (400MHz) of compound **15** in  $\text{CDCl}_3$

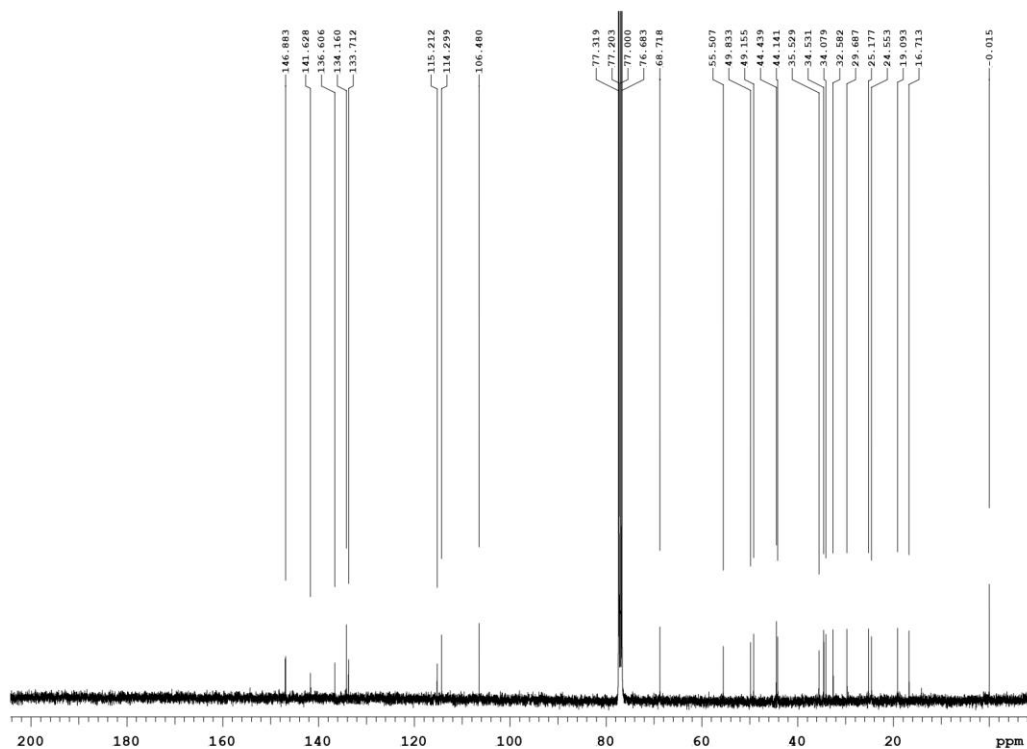

**Figure S64.**  $^{13}\text{C}$  NMR spectrum (100 MHz) of compound **15** in  $\text{CDCl}_3$

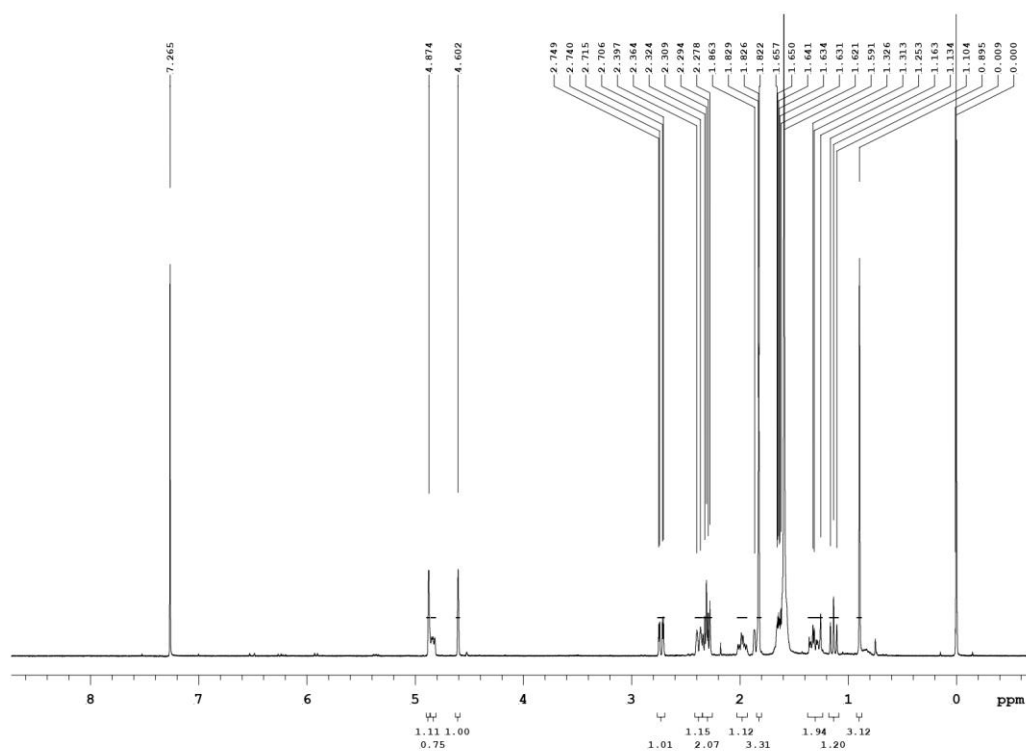

**Figure S65.**  $^1\text{H}$  NMR spectrum (400MHz) of compound **16** in  $\text{CDCl}_3$

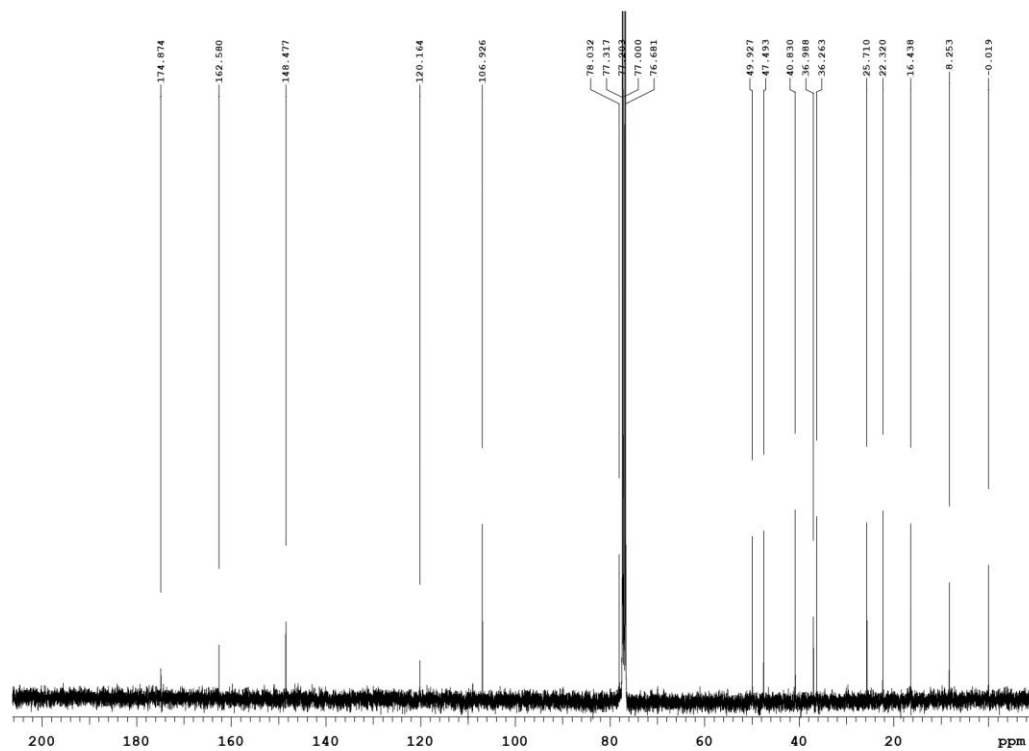

**Figure S66.**  $^{13}\text{C}$  NMR spectrum (100 MHz) of compound **16** in  $\text{CDCl}_3$

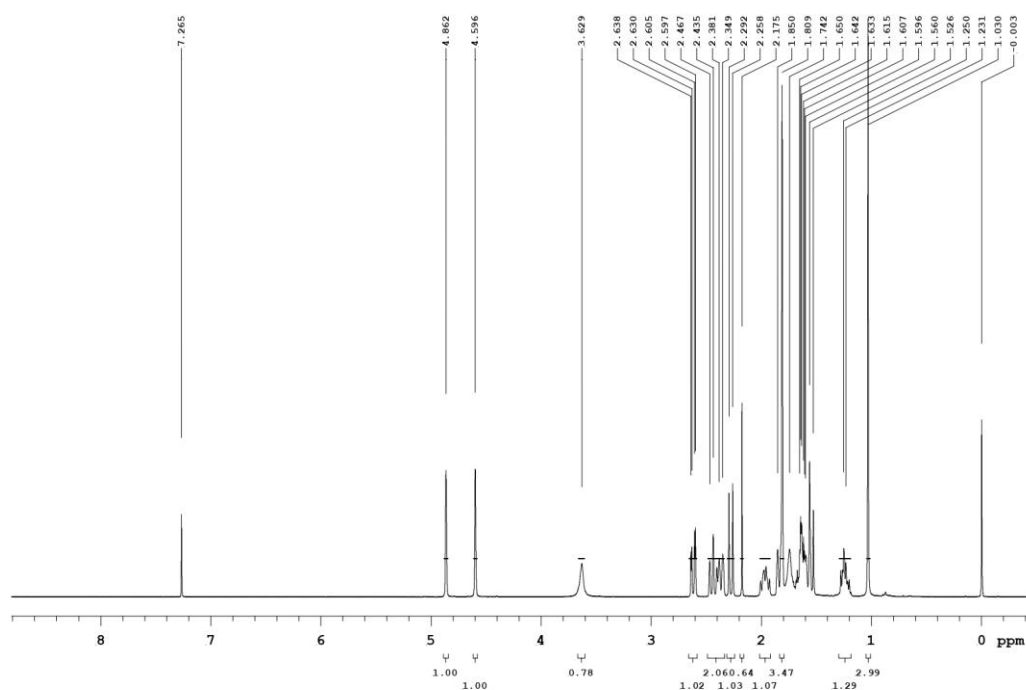

**Figure S67.** <sup>1</sup>H NMR spectrum (400MHz) of compound **17** in CDCl<sub>3</sub>

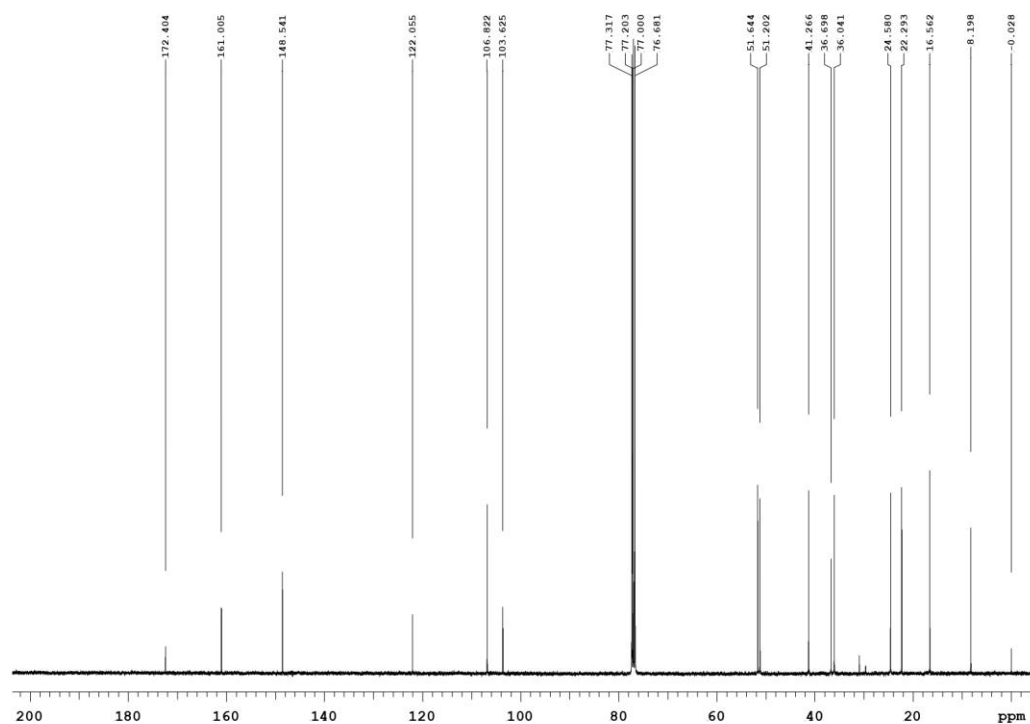

**Figure S68.** <sup>13</sup>C NMR spectrum (100 MHz) of compound **17** in CDCl<sub>3</sub>

Table S1. The cytotoxicity data of compounds **1–16** and **1a**.

| Compounds   | Cell lines IC <sub>50</sub> (μg/mL) |           |       |
|-------------|-------------------------------------|-----------|-------|
|             | HepG2                               | MDA-MB231 | A549  |
| <b>1</b>    | > 20                                | > 20      | > 20  |
| <b>1a</b>   | > 20                                | > 20      | > 20  |
| <b>2</b>    | > 20                                | > 20      | > 20  |
| <b>3</b>    | > 20                                | > 20      | > 20  |
| <b>4</b>    | > 20                                | > 20      | > 20  |
| <b>5</b>    | > 20                                | 15.40     | 18.74 |
| <b>6</b>    | > 20                                | > 20      | > 20  |
| <b>7</b>    | > 20                                | > 20      | > 20  |
| <b>8</b>    | > 20                                | > 20      | > 20  |
| <b>9</b>    | > 20                                | > 20      | > 20  |
| <b>10</b>   | > 20                                | > 20      | > 20  |
| <b>11</b>   | > 20                                | > 20      | > 20  |
| <b>12</b>   | > 20                                | > 20      | > 20  |
| <b>13</b>   | > 20                                | > 20      | > 20  |
| <b>14</b>   | > 20                                | > 20      | > 20  |
| <b>15</b>   | > 20                                | > 20      | > 20  |
| <b>16</b>   | > 20                                | > 20      | > 20  |
| Doxorubicin | 0.37                                | 0.30      | 0.15  |

Table S2. Antibacterial activity (zone of inhibition in mm).

| Compounds<br>(25 µg/disk) | Inhibition zone (mm) |              |              |              |              |              |              |              |              |              |
|---------------------------|----------------------|--------------|--------------|--------------|--------------|--------------|--------------|--------------|--------------|--------------|
|                           | <i>B. s.</i>         | <i>S. a.</i> | <i>S. e.</i> | <i>E. a.</i> | <i>E. c.</i> | <i>K. p.</i> | <i>S. m.</i> | <i>S. s.</i> | <i>S. t.</i> | <i>Y. e.</i> |
| <b>3</b>                  | –                    | –            | –            | –            | –            | –            | –            | –            | –            | –            |
| <b>4</b>                  | –                    | –            | –            | –            | –            | –            | –            | –            | –            | –            |
| <b>5</b>                  | –                    | –            | 6            | –            | –            | 5            | –            | –            | –            | –            |
| <b>6</b>                  | –                    | –            | –            | –            | –            | –            | –            | –            | –            | –            |
| <b>7</b>                  | –                    | –            | –            | –            | –            | –            | –            | –            | –            | –            |
| <b>9</b>                  | –                    | –            | –            | –            | –            | 9            | –            | –            | –            | –            |
| <b>12</b>                 | –                    | –            | –            | –            | –            | –            | –            | –            | –            | –            |
| Ampicillin                | 9                    | 12           | 10           | 5            | 5            | 5            | 8            | 9            | 8            | 18           |

–: Inactive

Ampicillin: Positive control

*B. s.*: *Bacillus subtilis* (ATCC6051)

*S. a.*: *Staphylococcus aureus* (ATCC9144)

*S. e.*: *Salmonella enterica* (ATCC13076)

*E. a.*: *Enterobacter aerogenes* (ATCC13048)

*E. c.*: *Escherichia coli* (ATCC25922)

*K. p.*: *Klebsiella pneumoniae* (ATCC10031)

*S. m.*: *Serratia marcescens* (ATCC25419)

*S. s.*: *Shigella sonnei* (ATCC11060)

*S. t.*: *Salmonella typhimurium* (ATCC14028)

*Y. e.*: *Yersinia enterocolitica* (ATCC23715)



Table S3. Inhibitory effects of compounds **1–10**, **1a**, **14**, and **15** on TNF- $\alpha$  expression, PGE<sub>2</sub>, and NO production in LPS induced dendritic cells.

| Compounds        | Inh % <sup>1</sup>  |                  |                     |
|------------------|---------------------|------------------|---------------------|
|                  | TNF- $\alpha$       | PGE <sub>2</sub> | NO                  |
| <b>1</b>         | 2.3 $\pm$ 2.0       | 2.9 $\pm$ 1.5    | 11.0 $\pm$ 2.4      |
| <b>1a</b>        | −0.1 $\pm$ 1.6      | −0.8 $\pm$ 5.9   | 14.0 $\pm$ 1.5 *    |
| <b>2</b>         | 7.3 $\pm$ 3.2       | 12.8 $\pm$ 3.5   | 19.6 $\pm$ 4.0 ***  |
| <b>3</b>         | 8.0 $\pm$ 3.0       | 11.4 $\pm$ 2.1   | 33.8 $\pm$ 1.5 ***  |
| <b>4</b>         | 3.8 $\pm$ 2.7       | 2.4 $\pm$ 2.1    | 34.9 $\pm$ 3.9 ***  |
| <b>5</b>         | 0.8 $\pm$ 1.8       | 3.5 $\pm$ 4.2    | 16.0 $\pm$ 3.7 **   |
| <b>6</b>         | 5.0 $\pm$ 2.9       | −4.4 $\pm$ 0.4   | 14.6 $\pm$ 3.9 *    |
| <b>7</b>         | 1.9 $\pm$ 5.1       | −7.6 $\pm$ 2.8   | 3.7 $\pm$ 5.7       |
| <b>8</b>         | 0.2 $\pm$ 0.5       | −4.9 $\pm$ 3.2   | 10.2 $\pm$ 3.2      |
| <b>9</b>         | 3.3 $\pm$ 1.7       | 1.2 $\pm$ 5.9    | 16.8 $\pm$ 4.7 **   |
| <b>10</b>        | −3.9 $\pm$ 1.1      | −11.5 $\pm$ 4.6  | 11.9 $\pm$ 2.7      |
| <b>14</b>        | 5.2 $\pm$ 1.8       | −8.8 $\pm$ 6.3   | 24.8 $\pm$ 1.4***   |
| <b>15</b>        | 23.6 $\pm$ 2.5 ***  | 21.2 $\pm$ 0.9 * | 35.0 $\pm$ 3.7 ***  |
| DEX <sup>2</sup> | 85.6 $\pm$ 3.4 **** | –                | 73.4 $\pm$ 1.3 **** |

1. Percentage of inhibition (Inh %) at the concentration 100  $\mu$ M for **1–3**, **5**, **7**, **9**, **11**, **14** and **15** and 25  $\mu$ M for **4**, **6**, and **8** compared with the control group (100 % for stimulated LPS alone). Results are presented as mean  $\pm$  SEM. (n = 3). \* p < 0.05, \*\* p < 0.01, \*\*\* p < 0.001, \*\*\*\* p < 0.0001.

2. Positive control: dexamethasone (DEX) at 100  $\mu$ M.
